# Supplementary material for: A 10-year characterization of the Saharan Air Layer lidar ratio in the subtropical North Atlantic
Source: Copernicus journal article supplement (doi:10.5194/acp-2018-1315), 2019-01-10
Supplement: Supplementary file [file acp-2018-1315-RC2-supplement.pdf]

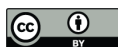

## A 10-year characterization of the Saharan Air Layer lidar ratio in the subtropical North Atlantic

Alberto Berjón<sup>1,2</sup>, Africa Barreto<sup>3,1,2</sup>, Yballa Hernández<sup>1</sup>, Margarita Yela<sup>4</sup>, Carlos Toledano<sup>2</sup>, and Emilio Cuevas<sup>1</sup>

<sup>1</sup>Izaña Atmospheric Research Center (IARC), State Meteorological Agency (AEMET), Spain

<sup>2</sup>Atmospheric Optics Group, University of Valladolid, Spain

<sup>3</sup>Cimel Electronique, France

<sup>4</sup>Atmospheric Research and Instrumentation Branch, National Institute for Aerospace Technology (INTA), Spain

**Correspondence:** Emilio Cuevas  
([ecuevas@aemet.es](mailto:ecuevas@aemet.es))

### Abstract.

Particle extinction-to-backscatter ratio (lidar ratio) is a key parameter for a correct interpretation of elastic lidar measurements. Of particular importance is its determination for Saharan Air Layer mineral dust transported into the free troposphere over the North Atlantic region. The location of the two sun photometer stations managed by the Izaña Atmospheric Research Centre (IARC) on the island of Tenerife, and a decade of available micropulse lidar (MPL) data allows us to determine the lidar ratio under almost pure dust conditions. This result can be considered representative of the Saharan dust transported westward over the North Atlantic in the subtropical belt.

Three different methods to calculate the lidar ratio have been used in this work: (1) using the inversion of sky radiance measurements from a sun/sky photometer installed at the Izaña Observatory (2373 m a.s.l.) in free troposphere conditions; (2) the One-Layer method, a joint determination using a micro-pulse lidar sited at Santa Cruz de Tenerife sea-level station and photometric information considering a one layer of aerosol characterized by a single lidar ratio; (3) the Two-Layer method, a joint determination using the micro-pulse lidar and photometric information considering two layers of aerosol with two different lidar ratios. The One-Layer method uses data from a co-located photometer only at Santa Cruz de Tenerife, while the Two-Layer conceptual approach incorporates photometric information at two heights from the observatories of Izaña and Santa Cruz de Tenerife. The almost pure dust lidar ratio retrieval from the sun/sky photometer and from the Two-Layer method give similar results, with lidar ratios at 523 nm of  $49 \pm 6$  sr and  $50 \pm 11$  sr, respectively. These values obtained from a decade of data records are coincident with other studies in the literature reporting campaigns in the subtropical North Atlantic region. This result shows that the Two-Layer method is an improved conceptual approach compared to the single layer approach, that matches well the real lower troposphere structure. The Two-layer method is able to retrieve reliable lidar ratios and therefore aerosol extinction profiles, despite the inherent limitations of the elastic lidar technique.

A lack of correlation between lidar ratio and Ångström exponent ( $\alpha$ ) indicates that the dust lidar ratio can be considered independent of dust size distribution in this region. This finding suggests that dust is, in most of atmospheric conditions, the predominant aerosol in the North Atlantic free troposphere.



## 1 Introduction

Lidars are the most widely used systems for continuous monitoring of the vertical structure of atmospheric aerosols. The majority of the ground-based lidars used worldwide for aerosol monitoring are elastic backscatter lidars, as reported by Müller et al. (2007) and Mona et al. (2012). The main advantage of these systems is that they are relatively simple and low cost in comparison to other more complex systems, like lidar Raman. However, the ratio between the aerosol extinction ( $\sigma_{aer}$ ) and backscattering ( $\beta_{aer}$ ) coefficients should be considered constant throughout the atmospheric column in order to be able to estimate both magnitudes. This ratio is known as aerosol extinction-to-backscatter ratio or lidar ratio,  $S_{aer} = \sigma_{aer}/\beta_{aer}$ . The lidar ratio is an intensive parameter characteristic of the type of aerosol present in the atmosphere, and it depends on microphysical aerosol properties, such as the refractive index and size distribution, but not on the aerosol load (Evans, 1988; Mona et al., 2006). This parameter is also required to convert the particle backscatter profiles into particle extinction profiles, and therefore it is essential to estimate the aerosols' radiative effect.

The uncertainty of the lidar ratio determines the accuracy of the retrieved profiles. Typical relative errors in the retrieved backscatter and extinction profiles of 10 % and 20 % respectively, are assumed for the combined lidar/photometer technique, low enough for climate impact studies (Bösenberg and Hoff, 2007). However, since the lidar ratio connects these two optical quantities, both of which are dependent on the incident light wavelength and the aerosol properties (Ackermann, 1998), the presence of different aerosols in a real atmosphere prevents the assumption of a constant range-independent value for elastic lidars. Hence, errors considerably higher may be expected in case of complex aerosol distributions such as the presence of different aerosol layers in the vertical (Pelón et al., 2002; Ansmann, 2006; Ansmann et al., 2013; Müller et al., 2007), horizontal inhomogeneous aerosol layers (Ansmann, 2006) or even in the case of well-mixed layers because of the effect of the relative humidity, which may produce a change in size distributions and refractive indices (Ackermann, 1998). Many authors have shown that significant errors in the aerosol extinction profile may appear in the case of an inaccurate assumption of the aerosol extinction-to-backscatter ratio, more evident as the atmosphere becomes more inhomogeneous (e.g. Kovalev, 1995; Barnaba and Gobbi, 2001; Pelón et al., 2002; Ansmann, 2006). It occurs typically in the lower atmosphere (Barnaba and Gobbi, 2001), and more precisely within the planetary boundary layer (PBL), where the atmospheric aerosol properties are range-dependent (Ackermann, 1998), or in the presence of atmospheric layering such as the Sahara Air Layer (SAL) (Prospero and Carlson, 1972). Following these authors, it is necessary to change the conventional approach of a single aerosol layer with a constant lidar ratio value as input.

One of the areas in which the lidar ratio has a more relevant role is satellite remote sensing. NASA's CALIOP (Cloud-Aerosol Lidar with Orthogonal Polarization), launched in April 2006, provides a global coverage of cloud and aerosol profiles using a three-channel elastic backscatter lidar. This system needs an assumption about the lidar ratio to retrieve the extinction coefficient, which is done by means of an automated aerosol classification algorithm. The selection of the lidar ratio is one of the largest sources of uncertainty in the CALIOP retrievals (Young et al., 2013). CALIOP data processing V4, released in 2016, contain a reassessment of the lidar ratio assigned to each aerosol type (Kim et al., 2018). CALIOP lidar ratio for mineral dust at 532 nm in this new version has been increased from  $40 \pm 20$  sr to  $44 \pm 9$  sr.



Given that desert dust is one of the most prominent and widespread atmospheric aerosols, there are a number of publications concerning the reliable determination of mineral dust optical properties. However, there is little consensus about what lidar ratio is more appropriate for this aerosol type. Groß et al. (2013) performed a comprehensive analysis on the different lidar ratios reported in prior studies for pure desert Saharan dust. They found very different values, ranging between 40 sr and 70 sr and set a value of  $48 \pm 5$  sr by means of airborne lidar observations. This variability may be due to different physical properties of the mineral dust for different regions (Papayannis et al., 2008), and to the inevitable mix of aerosols of different nature present in different layers, although it may also be due to the different techniques used to obtain this parameter. These results are in agreement with other authors who proposed lidar ratios from about 40 sr (Omar et al., 2009) up to around 59 sr (Müller et al., 2007; Amiridis et al., 2013).

In this work, we present a lidar ratio assessment for mineral dust aerosol obtained from 10 years of lidar and photometric measurements made in the island of Tenerife, which is strongly influenced by the Saharan Air Layer, especially in summer at higher altitudes. The SAL has been extensively described as a well-mixed layer with a fairly constant potential temperature, vapor mixing ratio and dust particles concentration with height (Prospero and Carlson, 1980; Prospero, 1996; Karyampudi et al., 1999). Possible mixing and ageing processes are not expected to be relevant near the dust source in the free troposphere, as is the case of Tenerife, where mineral dust can be anticipated to be the dominant aerosol. Three different techniques have been used to obtain the lidar ratio of mineral dust. Firstly, it has been determined using the inversion retrievals of sky radiance measurements taken by a sun/sky photometer placed at a high-mountain station: the single-scattering albedo and the particle phase function at  $180^\circ$  (Müller et al., 2007). Secondly, the lidar ratio is determined by the classical Fernald-Klett method (Fernald, 1984; Klett, 1985). Finally the Fernald-Klett method is extended considering two different aerosol layers. We will refer as the One-Layer method, the inversion using aerosol optical depth (AOD) measurements in a single layer (the surface layer), and as the Two-Layer method when AOD measurements in two atmospheric layers are used. In the latter methodology we include measurements at sea level and at a high mountain site (2373 m a.s.l), taking advantage of the singular orographic characteristics of Tenerife. While the lower layer is typically affected by two types of aerosols (mix of marine aerosols and dust), the higher layer is periodically affected by Saharan desert dust outbreaks (Cuevas et al., 2015a, 2017a) and the predominance of almost pure desert dust conditions can be anticipated at these levels. In our case, the One-Layer method leads to an average  $S_{aer}$  that will be closer to values characteristic of a mixture of marine and dust aerosols, meanwhile the Two-Layer method provides an average  $S_{aer}$  typical of almost pure dust.

So far, no systematic long-term study of elastic lidar data considering two layers has been reported. Only Cordoba-Jabonero et al. (2014) analyzed one year, 2009, of the lidar data presented in this work with a different methodology.

The paper is structured as follows. Site description is done in Section 2, while the instruments used in this study are described in Section 3. A description of the aerosol in the study region is provided in Section 4. The lidar ratio calculation from sun/sky photometer measurements, and from the One- and the Two-Layer methods are explained in Section 5. An assessment of the lidar ratio obtained for mineral dust using the different methodologies is presented in Section 6, which also includes an assessment on the impact of considering a range-independent lidar ratio in the inversion method and an analysis on the lidar ratio dependence with particle size. Finally, the main conclusions of this study are given in Section 7.



## 2 Site description

The Canary Islands weather is heavily influenced by the north-east trade winds and the Azores High, which are primarily responsible for the existence of a near permanent temperature inversion over the area (Alonso-Pérez et al., 2011; Carrillo et al., 2016) at a height generally between 800 and 1500 m.a.s.l. (Carrillo et al., 2016; Martín et al., 2012). This temperature inversion  
5 caps a wet and relatively cold marine boundary layer (MBL) in which the marine aerosol dominates. Above the temperature inversion, the air mass is generally representative of free troposphere (FT) conditions, with very low particle concentrations during most of the year.

Due to its proximity to the African continent, this area is occasionally affected by the SAL, especially during the summer months, with dust-laden air mass intrusions (Cuevas et al., 2013; Rodríguez et al., 2015). The SAL is considered a relatively  
10 dry, warm and well-mixed layer characterized by a relative diurnal stability of Saharan dust optical properties (Prospero and Carlson, 1980; Prospero, 1996; Karyampudi et al., 1999). Smirnov et al. (1998) and Barreto et al. (2014) reported high AOD stability conditions during dust outbreaks at Izaña Observatory. SAL intrusions over Tenerife can affect the FT, the MBL or both. Figure 1 shows an example of a SAL intrusion over the island of Tenerife on August 2014, where the dust layer is well  
15 separated from the MBL 

The Izaña Atmospheric Research Centre (IARC) manages two atmospheric monitoring stations on the island of Tenerife (Fig. 2). The Izaña Observatory (IZO) is the principal site. It is situated on the top of the Izaña mountain, (28.309°N, 16.499°W, 2373 m a.s.l.), and is one of the World Meteorological Organization Global Atmosphere Watch (GAW) stations (Cuevas et al., 2015b, 2017b). This station is also a reference calibration site for worldwide aerosol monitoring networks such as the AEROSOL  
20 RObotic NETwork (AERONET) (Toledano et al., 2018). The Santa Cruz Observatory (SCO) is located near the coastline in the city of Santa Cruz de Tenerife (28.473°N, 16.247°W, 52 m a.s.l.). Both sites are separated by 30 km horizontally, but since the Izaña Observatory is in the FT, and thus free from the influence of the ground surface, we assume that the measurements made at the IZO are also representative of the atmosphere over the SCO.

## 3 Instruments and measurements

### 3.1 Sun photometer data

25 Cimel sun photometers are used to retrieve both  $AOD$  and sky radiance at Santa Cruz Observatory ( $AOD_{SCO}$ ) and at Izaña Observatory ( $AOD_{IZO}$ ). The whole data series are available through the AERONET network (Holben et al., 1998). In this work, we have used the cloud-screened Level 1.5 products (Smirnov et al., 2000) processed by AERONET (algorithm Version 2.0) despite AERONET quality assurance  $AOD$  Level 2.0 (Holben et al., 2006) generally being recommended for climatological studies. Level 1.5 was chosen because some products like the single scattering albedo, which is used in this work, are  
30 only rise to level 2.0 at  $AOD > 0.4$  for 440 nm, a condition that is rarely reached at the Izaña station. However, the requirements applied in Level 2.0 have been established to guarantee the quality of the products in most of the sites through the entire AERONET network. Izaña station together with Mauna Loa Observatory are calibration centers for AERONET reference pho-

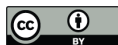

tometers, which are later used for the calibration by intercomparison of AERONET's field photometers. The capability for Langley plot calibration at Izaña Observatory has been demonstrated by Toledano et al. (2018), which implies that the calibration of the photometers used in the Izaña data series is much more precise than in other sites. As a consequence, the restrictive criteria of the AERONET Level 2.0 product has not been assumed in this work.

### 5 3.2 LIDAR data

The IARC, in collaboration with the Spanish National Institute for Aerospace Technology (INTA), has operated an elastic Micro-Pulse Lidar (MPL, Science & Engineering Services Inc., model 1000 v.3) at Santa Cruz de Tenerife site since 2002. In 2005, the operation of this instrument was automated and it was integrated into the Micro-Pulse Lidar NETwork (MPLNET) (Welton et al., 2001). The technical specifications of this instrument can be found in Table 1.

10 The lidar signal inversion have been applied to the MPL profiles obtained during a decade, from 2007 to 2017, except for the year 2010, when the instrument was not in operation due to upgrading and maintenance procedures. The maintenance and homogeneity of the data series over such a long period requires an important effort to periodically re-calibrate dark current, afterpulse and overlap (Campbell et al., 2002). In particular, the determination of the overlap function, fundamental to guarantee the quality of MPL measurements, has been obtained from horizontal profiles by night made in the Izaña Observatory in optimal  
15 conditions, i.e. in free troposphere conditions and selecting nights with homogeneous atmospheric conditions (low aerosol load, low humidity, no clouds and low wind speed) (Campbell et al., 2002) 

A total of 53982 lidar profiles have been inverted using the One-Layer method and 18785 using the Two-Layer method. The latter is more restrictive since cloudless conditions and output *AOD* control are simultaneously required for both stations. *AOD* at MPL wavelength, 523 nm, has been calculated using Ångström power law with parameters estimated by linear  
20 regression from the AERONET *AOD* between 440 nm and 870 nm.

Since the Fernald-Klett method has been applied to cloud free conditions, AERONET level 1.5 has been used as a first filter to discard data affected by clouds. However, lidar and photometer perform observations in different directions, thus it was also necessary to develop a specific cloud screening for lidar data. Taking into account that only daytime data is analyzed in this work, we have used a simple cloud screening algorithm based on the temporal smoothness of the lidar background (Clothiaux  
25 et al., 1998). A second order polynomial fit between background,  $B(t)$ , and time, in a time windows of 15 minutes around  $t_i$ , has been used to determine if a measurement made in a time  $t_i$  is free of clouds. If  $RMSE < \sqrt{0.1B(t_i)}$ , we consider the observation free of clouds.

### 4 Aerosol description in the study region

Previous studies have shown that mineral dust dominates the aerosol regime in the study region (Basart et al., 2009; Guirado,  
30 2015; Cuevas et al., 2015a; García et al., 2017). In situ aerosol measurements conducted by García et al. (2017) in the Izaña Observatory concluded that mineral dust is the main contributor to background levels of aerosols in this site. Recirculated Saharan dust or dust from North America are hypothesized as the main contributors for these background levels. Basart et al.



(2009); Guirado (2015) and Cuevas et al. (2015a) corroborated that high AOD conditions ( $AOD > 0.1$ ) are associated with the presence of large particles (Ångström exponent or  $\alpha < 0.25$  for pure dust) due to the Saharan dust transport, more prevalent in Izaña in summer and in Santa Cruz de Tenerife in winter. Following Cuevas et al. (2015a), an Ångström exponent  $< 0.6$  can be used to discriminate those conditions where dust is the main aerosol component.

- 5 Sun photometer data have been used to assess the AOD limit for clean conditions in Izaña. This threshold will be used in the following sections to evaluate the lidar ratio in clean and dusty conditions. For  $AOD_{IZO} > 0.1$ , the Ångström exponent is almost constant and low (Fig. 3), pointing to the presence of predominantly coarse-mode aerosols. However, below the threshold in AOD of 0.1, we observe considerably higher  $\alpha$  values, up to median values of 1.3, confirming the presence of a predominant fine-mode of aerosols in Izaña and therefore the existence of clean conditions.
- 10 In terms of aerosol size distribution, the previous studies concluded that in clean conditions fine-mode aerosols dominate the aerosol size distribution in Izaña (with an effective radius,  $R_{eff}$ , of  $0.15 \mu\text{m}$ ), while a typical bimodal size distribution is observed at Santa Cruz with a dominance of coarse-mode maritime aerosols ( $R_{eff} \sim 1.72 \mu\text{m}$ ) over the fine mode ( $R_{eff} \sim 0.14 \mu\text{m}$ ). Under Saharan dust influence, a bimodal size distribution is also observed, with a dominant coarse-mode and an increase in the fine-mode aerosol volume concentration in both stations in relation to clean conditions.
- 15 These results suggest that mineral dust is the dominant aerosol in the FT of the subtropical North Atlantic region in both clean and dusty conditions.

## 5 Methodology

### 5.1 Lidar ratio from the sun/sky photometer

- The lidar ratio for mineral dust aerosols can be calculated using data from the photometer installed at the Izaña Observatory, where the presence of almost pure dust can be anticipated. Lidar ratio is not provided by AERONET but it can be easily calculated from the single scattering albedo,  $\omega$ , and the phase function at  $180^\circ$ ,  $P(180^\circ)$  (Eq. 1) (Müller et al., 2003).  $\omega$  and  $P(180^\circ)$  are obtained from the inversion of almucantar measurements (Dubovik and King, 2000; Dubovik et al., 2006).

$$S_{aer} = \frac{4\pi}{\omega P(180^\circ)} \quad (1)$$

- In order to be directly comparable with the lidar ratio obtained from the MPL signal inversion,  $S_{aer}(FT)$  from the photometer has been calculated for 523 nm by linear interpolation between the 440 nm and 670 nm photometer spectral bands. This method for lidar ratio calculation serves as validation for the two approaches using MPL data (the One- and the Two-Layer methods) but also as an independent and robust technique for lidar ratio determination.



## 5.2 One-Layer method. Analysis of the LIDAR data using AOD from a single photometer

The light measured by the LIDAR photomultiplier detector, corrected for dead time, associated with a certain range or height,  $n(r)$ , can be expressed as a sum of four terms (Campbell et al., 2002):

$$n(r) = \frac{CO(r)E\beta(r)T(r)^2}{r^2} + A(r, E) + D + B \quad (2)$$

- 5 The first term on the right of Eq. 2 corresponds to the laser light backscattered by the atmosphere that reaches the detector from a range  $r$ . Here,  $C$  is the lidar system constant,  $O(r)$  refers to the overlap correction ,  $E$  is the pulse energy,  $\beta(r)$  is the atmospheric backscattering coefficient and  $T(r)$  is the atmospheric transmittance, which is squared to account for the two-way transmission path from the lidar position to the sample volume. The following terms are the afterpulse,  $A(r, E)$ , and the dark count noise,  $D$ . The last term,  $B$ , denominated background, is the light that reaches the lidar from other sources, mainly
- 10 sunlight scattered by the atmosphere. The last two terms, dark count noise and background, do not depend on the range  $r$  and sometimes are considered together.

The range-corrected lidar signal (RCS),  $Z(r)$ , can be calculated from the measured signal as shown in Eq. 3 (Welton and Campbell, 2002):

$$Z(r) = r^2 \frac{n(r) - A(r, E) - D - B}{O(r)E} \quad (3)$$

- 15  $Z(r)$  gives us information about the lidar attenuated backscatter signal (Eq. 4), but it depends on two unknowns: the backscattering and extinction coefficients.

$$Z(r) = C\beta(r)T(r)^2 = C\beta(r)\exp\left(-2\int_0^r \sigma(x)dx\right) \quad (4)$$

The Fernald-Klett method  generally used to estimate the aerosol optical properties from elastic lidar measurements. This method makes the following assumptions:

- 20
- The atmosphere is composed by molecules and aerosols, so we can write  $\beta(r) = \beta_{mol}(r) + \beta_{aer}(r)$  and  $\sigma(r) = \sigma_{mol}(r) + \sigma_{aer}(r)$ . Optical properties of the molecular component are known.
  - Aerosol extinction or backscattering coefficient is known at a reference height:  $r_{ref}$ .
  - $S_{aer}$  can be considered constant at different heights.

Under these assumptions we can retrieve information of the aerosol using Eq. 5.

$$25 \quad \beta_{aer}(r) + \beta_{mol}(r) = \frac{Z(r)e^{-2(S_{aer}-S_{mol})\int_{r_{ref}}^r \beta_{mol}(\xi)d\xi}}{\frac{Z(r_{ref})}{\beta_{aer}(r_{ref}) + \beta_{mol}(r_{ref})} - 2S_{aer}\int_{r_{ref}}^r Z(\xi)e^{\int_{r_{ref}}^{\xi} \beta_{mol}(\xi')d\xi'} d\xi} \quad (5)$$

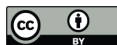

Since  $S_{aer}$  is unknown, the numerical integration of Eq. 5 using the downward method from  $r_{ref}$  (Fernald, 1984) is repeated for  $S_{aer}$  values from 1 to 100, with an increment of 1. For each repetition, the integrated  $\sigma_{aer}(r)$  along the atmospheric column is compared with the AOD from the collocated photometer. We select the value  $S_{aer}$  that minimizes this difference, removing those cases in which the minimum AOD difference is greater than 0.01. Finally,  $\beta_{aer}(r)$  and  $\sigma_{aer}(r)$  are those calculated with the chosen  $S_{aer}$ .

The signal-to-noise ratio ( $snr(r)$ ) is normally used to have an estimation of the signal strength relative to the noise at different heights. This magnitude is defined as follows:

$$snr(r) = \frac{n(r) - A(r, E) - D - B}{\sqrt{\frac{n(r)}{N}}} \quad (6)$$

where the numerator represents the laser light backscattered by the atmosphere at the range  $r$  reaching the detector, and the denominator is the noise associated with a detector when the incident photon count follows a Poisson distribution (Welton and Campbell, 2002).  $N$  is the number of shots during the acquisition of the signal. The noise is calculated considering not only the laser backscattered by the atmosphere, but also the background signal. Therefore, the  $snr$  drops as the altitude increases, with lower values during the day (Spinhirne, 1993).

In order to establish an upper bound to the lidar profile,  $r_{max}$ , we consider a  $snr(r)$  threshold of 3 (Morille et al., 2007) to limit the height at which meaningful data are obtainable.

To apply the Fernald-Klett method it is necessary to know the aerosol extinction or backscattering coefficient at a certain reference height,  $r_{ref}$ . If this height is selected high enough, the particle concentration will be zero and therefore  $\beta_{aer}(r_{ref})$  and  $\sigma_{aer}(r_{ref})$  can also be considered equal to zero. However, it is advisable not to choose a very high  $r_{ref}$  as the signal to noise ratio decreases with altitude and therefore the noise of the lidar signal can hinder the inversion process. Therefore, an optimum  $r_{ref}$  is the lowest altitude with no aerosols.

To identify the height-range free of aerosols, the measured range corrected signal can be compared to a calculated molecular attenuated backscattering profile,  $Z_m(r) = \beta_m(r)T_m(r)^2$ .  $Z_m(r)$  values can be calculated from air pressure and temperature at different heights following Kovalev and Eichinger (2005). Air pressure and temperature profiles can be obtained from local radiosondes or by means of meteorological analysis. In our case, and although radiosondes are available twice a day, we have used data from the Global Data Assimilation System (GDAS) Model from the National Centers for Environmental Prediction (NCEP) (Kanamitsu, 1989) so that the methodology can be applied to another place without restriction to the availability of on-site radiosondes. The ratio  $Z(r)/Z_m(r)$  should be invariant above  $r_{ref}$ , and so its derivative should be zero. We have empirically set a threshold method to find  $r_{ref}$  as described in the Eq. 7.

$$\frac{\partial}{\partial r} \left( \frac{Z(r)}{Z_m(r)} \right) < \frac{6Z(r)}{Z_m(r)snr(r)} \quad (7)$$

After re-scaling  $Z_m(r)$  to fit  $Z(r)$  between  $r_{ref}$  and  $r_{max}$ , it has been noted that  $Z(r_{ref})$  tends to be systematically slightly larger than  $Z_m(r_{ref})$  (Fig. 4). These results suggest that some aerosol can still be found at the altitude obtained from Eq. 7





and point to the need to apply a correction to this method. To this end, the lowest  $r$  above this first approximation for which  $Z_m(r) \geq Z(r)$  has been considered to get a refined reference height. Our results confirmed that, in 76 % of the analyzed profiles, this second  $r_{ref}$  is two or more steps above the first estimated value.

Occasional differences between the aerosols observed by the lidar and the photometer can be expected because of the different viewing geometry of these two systems. The lidar system constant  $C$ , has been used to filter these cases. This constant can be calculated using the relation  $Z(r) = CZ_m(r)T_{aer}^2$  above  $r_{ref}$ . Since this expression contains information from both the lidar ( $Z(r)$ ) and the photometer ( $T_{aer}$ ), an incorrect  $C$  value will be obtained if some differences exist in the aerosol observed by these two instruments. Over the 10-year period analyzed in this study, we obtained a mean value of  $12.8 \pm 1.6$  km and  $5.0 \pm 1.2$  km for  $r_{max}$  and  $r_{ref}$  respectively. This means that the effective free aerosol atmosphere for determining  $C$  is about 7 km. In this work we have rejected lidar data for which  $C$  differs from its daily average more than three times the daily standard deviation. However in case of intense dust intrusions at high altitude,  $r_{ref}$  gets too close to  $r_{max}$ , what prevents the application of the method.

### 5.3 Two-Layer method. Analysis of the lidar data using AOD from two photometers at different altitudes

The analysis of the lidar data using two photometers is also based on the Fernald-Klett method, and most of the procedure is equivalent to that described in Section 5.2. However, in this case we consider a height-dependent lidar ratio,  $S_{aer}(r)$ . This more realistic approximation leads us to propose the Two-Layer method as a conceptual model, rather than as an unreal approach to retrieve the particle extinction profile. Since we have two AOD measurement sites at different heights, we can determine two lidar ratios corresponding to two different layers. The question that immediately arises is where is the border of these two layers and how is the transition between the two layers, which is not a trivial issue.

As we have previously stated, the main characteristic of the study zone is the thermal inversion between 800 and 1500 m.a.s.l., located below the Izaña Observatory. Thus if we consider the limit between the two layers at Izaña Observatory height, the lower layer will include the MBL and the lower part of the FT. Instead, our approach in this work was to find the natural limit between the MBL and the FT, so that we can retrieve the associated lidar ratios of both layers,  $S_{aer}(MBL)$  and  $S_{aer}(FT)$ . The top of the MBL is generally associated with a strong reduction of the lidar backscatter signal (Fig. 5 (a)), thus the height of the limit between the MBL and the FT,  $r_l$ , can be easily determined as the largest negative vertical gradient in lidar signal (Endlich et al., 1979).

If we consider a discontinuity in  $S_{aer}(r)$ , this will lead to a discontinuity in the extinction coefficient, which is not likely to happen in the atmosphere. To avoid discontinuities, we have defined a transition zone between the MBL and the FT, where  $S_{aer}(r)$  varies linearly with height between  $S_{aer}(MBL)$  and  $S_{aer}(FT)$ . The lower limit of the transition zone is set to  $r_l$  and the upper limit,  $r_{l,max}$ , is defined as the height above  $r_l$  where the gradient is reduced below 20 % of its maximum value at  $r_l$  (Fig. 5 (a)).

To determine  $S_{aer}(FT)$ , we apply the same iterative method as in Section 5.2, to the AOD measured at Izaña Observatory and to the lidar profile from  $r_{ref}$  down to Izaña altitude,  $r_{Izaña}$ . To determine  $S_{aer}(MBL)$ , the iterative process is repeated for values from 1 to 100 with an increment of 1, but these  $S_{aer}(MBL)$  values are only used for heights below  $r_l$ .  $S_{aer}(r)$  is fixed

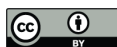

to the previously calculated  $S_{aer}(FT)$  value for heights between  $r_{l,max}$  and  $r_{Izaña}$ , and it is linearly interpolated between  $S_{aer}(FT)$  and  $S_{aer}(MBL)$  for the transition zone, between  $r_{l,max}$  and  $r_l$  (Fig. 5 (b)).

## 6 Results

We present in this work an evaluation of lidar ratios extracted from 10 years of systematic measurements performed by means of the three different techniques previously described (sun-photometry and the One- and the Two-Layer inversion techniques). This study aims to contribute to the knowledge about this important intensive aerosol property (lidar ratio) in a representative region of the Saharan dust transport over the subtropical North Atlantic towards the Americas.

In an effort to focus only on almost pure dust conditions, preventing the occurrence of mixtures of different aerosol types, we will restrict this analysis in the Two-Layer method and in the sun-photometry technique to the FT, where the influence of marine and anthropogenic aerosols is minimized and the prevalence of mineral dust can be ensured.

### 6.1 Lidar ratio characterization in the FT from sun photometer data

The aerosol lidar ratios derived from the sun/sky photometer at Izaña Observatory against the  $AOD_{IZO}$  are shown in Fig. 6. The corresponding histograms of  $S_{aer}(FT)$  for low AOD conditions ( $AOD_{IZO} \leq 0.1$ ) and high AOD conditions ( $AOD_{IZO} > 0.1$ ) are presented in Figs. 7 (a) and (b), respectively. This AOD limit has been set in Section 4. The existence of a large variability in lidar ratios is evident for low AOD conditions (Fig. 7 (b)), with a  $S_{aer}(FT)$  distribution centered in a mean value of  $52 \pm 12$  sr. However, for high aerosol load,  $S_{aer}(FT)$  dispersion is notably reduced, and a mean value of 49 sr is obtained with a lower standard deviation of 6 sr (Fig. 7 (b)).

### 6.2 Lidar ratio characterization in the FT and in the MBL from MPL elastic data (the One- and the Two-Layer inversion techniques)

The lidar ratio obtained by means of the classic Fernald-Klett method, the One-Layer method, is shown in Fig. 8 (a). Under clean conditions the lidar ratio remains low. However,  $S_{aer}$  increases as  $AOD_{SCO}$  increases, in conditions associated with the presence of the SAL. The mean lidar ratio obtained using this method is  $24 \pm 10$  sr, which is close to typical marine lidar ratio (Müller et al., 2007; Bréon, 2013). In the case of the Two-Layer inversion,  $S_{aer}(FT)$  behaves in a very different way for  $AOD_{IZO}$  higher and lower than 0.1 (Fig. 8 (b)). For high aerosol load conditions,  $S_{aer}(FT)$  is distributed symmetrically around a mean value of 50 sr, with a standard deviation of 11 sr (Fig. 9 (a)). However, for clean conditions ( $AOD_{IZO} < 0.1$ ), the common situation at the Izaña Observatory with 76 % of the data, the retrieved mean  $S_{aer}(FT)$  is similar, 51 sr, but the results are more scattered, with a standard deviation of 19 sr, and sometimes it reaches values much higher than 100 sr. In this work, lidar ratios above 100 sr are considered out of the range commonly accepted in the bibliography (Weitkamp, 2005) and eliminated from further analysis. The distribution of data for  $AOD_{IZO} < 0.1$  (Fig. 9 (b)) is asymmetric, with a rather heavy tail for high lidar ratios. The high dispersion observed in  $S_{aer}(FT)$  for low  $AOD_{IZO}$  may affect the retrieval of the aerosol properties in the MBL since, as discussed in Section 5.3, it is used in the inversion of the lower layer between



$r_{l,max}$  and  $r_l$ . In order to avoid this undesired effect,  $S_{aer}(FT)$  is fixed to 5 sr or clean conditions ( $AOD_{IZO} < 0.1$ ) and the inversion is repeated for the lower layer. The  $S_{aer}(MBL)$  thus obtained is shown in Fig. 8 (c). The behaviour of  $S_{aer}(MBL)$  is similar to that observed in the lidar ratio obtained with the One-Layer method, but in this case we can see lower lidar ratios associated with AOD up to 0.2. This is because the lidar ratio and the AOD do not correspond exactly to the same layers.  $AOD_{SCO} - AOD_{IZO}$  refers to the layer from the sea level to the Izaña Observatory level, while  $S_{aer}(MBL)$  refers to the layer up to  $r_l$ .

These results are repeated throughout all the years of the analyzed decade. The lidar ratios estimated by the One-Layer method (Fig. 10 (a)) are midway between those ~~those~~ obtained by the Two-Layer method (Fig. 10 (b)) for the FT, dominated by mineral dust, and the MBL.

### 6.3 Lidar ratio evaluation and comparison with previous studies

A summary of the mean and standard deviation of  $S_{aer}$  obtained using the three inversion methods proposed in this study can be found in Table 2. The One-Layer method provides a mean lidar ratio of  $24 \pm 10$  sr, meanwhile the value retrieved for the lower layer in the Two-Layer method is lower ( $16 \pm 11$  sr). This last result is quite similar to the lidar ratio of North Atlantic marine aerosol of  $18 \pm$  sr reported by Groß et al. (2013), who determined this value by means of airborne High Spectral Resolution Lidar (HSRL) observations. Cordoba-Jabonero et al. (2011) used the same MPL system at Santa Cruz de Tenerife during a short period, finding a columnar lidar ratio of 24 sr for non-dusty conditions, which matches the value we give using the One-Layer method, and 69 sr for mixed-dust conditions, much higher than the one we determined in our study. Cordoba-Jabonero et al. (2014) considering two layers found a lidar ratio of 43 sr for MBL under Saharan dusty conditions using the same instrument as in this work. These widely varying lidar ratios reflect the difficulty to determine the lidar ratio at lower altitudes. The different methodologies and assumptions made in the different studies, the heterogeneity in aerosol composition at these altitudes as well as the added problem of the higher uncertainties in ground-based elastic lidars at lower altitudes due to the overlap effect prevent us from determining a reliable lidar ratio in the MBL.

The comparison analysis between the lidar ratio in the FT ( $S_{aer}(FT)$ ) from the Two-Layer method and the value derived independently from the sun/sky photometer at Izaña Observatory in the 10-year time period of this study is presented in Figure 11. Since both methods use different measurements done by the photometer at Izaña (direct sun and sky measurements), there are no simultaneous measurements and therefore daily means are calculated for both series and coincident values are chosen.  $S_{aer}(FT)$  values of  $52 \pm 12$  and  $49 \pm 6$  sr for low and high AOD conditions, respectively, were retrieved from the sun/sky photometer (Table 2). Similar values of  $51 \pm 19$  sr and  $50 \pm 11$  sr were respectively obtained from the Two-Layer method. As can be seen, the mean discrepancies between both methods calculated in this way is 1 sr, confirming the consistency of the  $S_{aer}(FT)$  obtained with the two methods throughout a decade. These results are in very good agreement with the value of  $48 \pm 5$  sr found by Groß et al. (2013) for "pure" dust using airborne HSRL observations performed in a region near the Canary Islands. Cordoba-Jabonero et al. (2014) found a higher  $S_{aer}(FT)$  of 56 sr with a two layers approach using the same instrument as in this work but with a different data processing. All these results are considerably higher than the lidar ratio



assigned for mineral dust in the CALIOP aerosol classification algorithm ( $44 \pm 9$  sr). This underestimation of CALIOP lidar ratio for dust has been shown in other studies (Papagiannopoulos et al. (2016) and references herein).

A higher dispersion in the  $S_{aer}(FT)$  calculated from both sun-photometry and MPL data is observed for clean conditions. This larger dispersion may be due to the uncertainty associated with the low aerosol load, or to the characteristics of the residual aerosol that is present in these cases.

#### 6.4 Assessment of the impact of using a constant range-independent lidar ratio in the inversion algorithm

Our results indicate that the conceptual model presented in the Two-Layer method, with two lidar ratios associated with the two different layers which are easily identifiable at this subtropical site, is a more reliable approach to retrieve the FT lidar ratio in this region than the common One-Layer approach. However, the impact of choosing one of these two approaches on the aerosol vertical profile after inversion is still unclear. A comparison analysis based on  $\beta_{aer}(r)$  and  $\sigma_{aer}(r)$  calculated using the One- and the Two-Layer methods in such relevant measurement period has been used to assess the inaccuracies that we could be committing on the aerosol vertical profile by using the classical One-Layer method.

Some examples of the extinction and backscattering coefficients profiles extracted under different aerosol loading scenarios are firstly presented to give evidence of the differences between these two inversion techniques. Figure 12 shows  $\beta_{aer}(r)$  and  $\sigma_{aer}(r)$  profiles for a moderate Saharan dust outbreak ( $AOD_{SCO} = 0.46$  and  $AOD_{IZO} = 0.28$  at 523nm), retrieved on August 5, 2013, with the One- and the Two-Layer methods. A higher  $\beta_{aer}(r)$  along the whole profile is retrieved for the One-Layer inversion, with a maximum difference at about  $r_l$  and same values for the minimum range and  $r_{ref}$ . Regarding the aerosol extinction profile, the differences between the aerosol extinction profiles obtained by the two methods are readily apparent. The One-Layer method underestimates  $\sigma_{aer}(r)$  in the FT, and overestimates  $\sigma_{aer}(r)$  in the MBL. The peak near  $r_l$  in  $\sigma_{aer}(r)$  retrieved from this method, due to the proportionality with  $\beta_{aer}(r)$ , almost disappears in the profile retrieved with the Two-Layer method. Nevertheless, a small discontinuity remains at  $r_l$  height, maybe due to our  $S_{aer}(r)$  approximation between  $r_l$  and  $r_{l,max}$ . Another example of the retrieval by both methods, in this case for clean conditions ( $AOD_{SCO} = 0.10$  and  $AOD_{IZO} = 0.006$  at 523nm), is shown in Fig. 13. This example corresponds to December 27, 2012, when there was pristine conditions above the MBL. In this case the results from both methods are more similar, with the most noticeable difference between them being found in the residual aerosol above the MBL, where the aerosol extinction coefficient is underestimated in the case of the One-Layer method. Aerosol extinction coefficient at lower levels are also slightly overestimated by the One-Layer method. Finally, Fig. 14 shows an example of retrieval under heavy dust intrusion on June 28, 2012 ( $AOD_{SCO} = 0.82$  and  $AOD_{IZO} = 0.48$  at 523nm). In this case, most of the aerosol in both layers is dust, and the lidar ratio obtained by the One- and the Two-Layer methods is very similar. We can extract from this preliminary comparison analysis that the classical One-Layer approach underestimates the aerosol extinction profile in the FT for clean conditions and moderate Saharan dust outbreaks, while overestimating aerosol extinction in the MBL. It is precisely in these conditions when the lidar ratio is expected to be range-dependent. Clean conditions are associated with marine aerosols as the dominant aerosol in the MBL while dust is expected to be the dominant aerosol in the FT. Moderate dust outbreaks affecting Santa Cruz de Tenerife station, which mainly occur during winter, are associated with dust and marine as the dominant aerosols in the MBL, with almost pure dust as the



dominant aerosol in the FT. On the contrary, strong dust outbreaks, although less frequent, result in a strong impact of dust in both the MBL and the FT, with dust as the dominant aerosol in the lower troposphere. A range-independent lidar ratio is therefore a plausible approximation in these conditions.

The main statistics of the  $\beta_{aer}(r)$  and  $\sigma_{aer}(r)$  differences between the two lidar inversion methods have been calculated for the period 2007-2017 and presented in Fig. 15.  $\sigma_{aer}(r)$  difference shows a median value of about 92 % at surface level, and -25 % above the thermal inversion, and  $\beta_{aer}(r)$  difference shows a median value up to 21 %. Maximum  $\sigma_{aer}$  differences are found at surface level, where  $\sim 25$  % of the single layer inversions overestimate  $\sigma_{aer}$  by more than 200 %. These results represent a quantification of the impact of using a range-independent lidar ratio in the subtropical North Atlantic, where two well-differentiated layers in the vertical constitute a meteorological feature of the lower troposphere.

## 6.5 Analysis of the lidar ratio dependence with particle size for almost pure dust

A good knowledge of the possible correlation between lidar ratio and particle size of pure mineral dust might help in the optical properties retrieval or provide useful information for aerosol classification algorithms. As an intensive aerosol property, the dust lidar ratio is independent of aerosol loading and is strongly dependent on the mineral dust micro-physical properties. Therefore, a lack of correlation between  $S_{aer}(FT)$  and  $AOD_{IZO}$  could be anticipated. However, since the AOD regime at Izaña is strongly associated with different dominant modes in particle size distribution (varying from a dominant fine mode in clean conditions to a dominant coarse mode under Saharan dust outbreaks), this lack of expected correlation may be questioned. The previous analysis has been extended for different intervals of  $AOD_{IZO}$ , including a lidar ratio statistic of the two inversion methods. Both methods are able to extract a stable  $S_{aer}(FT)$  with AOD, especially for  $AOD_{IZO} > 0.1$ , where the results are almost independent of the aerosol load, as can be seen in Fig. 16. A lower dispersion is clearly observed in the lidar ratio from the sun/sky photometer at Izaña in addition to a small increase in  $S_{aer}(FT)$  for clean conditions.

Ångström exponent is also an important optical parameter which is related to particle size. As Song et al. (2018) stated, a close relationship between lidar ratio and Ångström exponent can be anticipated for certain types of aerosols. The correlation between these two parameters reflects the possible relationship between the directional characteristics of the light scattered and particle size. We have focused on the relationship between the Ångström exponent,  $\alpha$ , and lidar ratio for dust, and therefore we have restricted the Ångström exponent to  $\alpha < 0.6$  conditions according to the criterion presented in Cuevas et al. (2015a) for dust as the dominant aerosol. To this end, we have used information of Ångström exponent extracted from the sun/sky photometer at Izaña and lidar ratios from sun/sky photometry (Fig. 17 (a)) and from the Two-Layer method (Fig. 17 (b)) in the same 10-year time period (2007-2017). Figures 17 (a) and (b) show that lidar ratio for mineral dust as dominant aerosol ( $\alpha < 0.6$ ) is almost independent on  $\alpha$ . This figure shows median values ranging from 46.4 to 49.6 for  $S_{aer}(FT)$  calculated from the sun/sky photometer and from 46 to 50 for  $S_{aer}(FT)$  retrieved using the Two-Layer method. These results differ from those found by other authors (Song et al., 2018; Balis et al., 2004), who found some correlation between these two optical parameters. Song et al. (2018) found a strong correlation between lidar ratio and  $\alpha$  for desert aerosol using a synthetic database theoretically generated using Mie scattering theory, while Balis et al. (2004) found an anticorrelation between them using



Raman lidar measurements at Thessaloniki of lofted dust plumes from Sahara. This latter result was attributed to a probable mixture of different aerosols.

The fact that lidar ratio for mineral dust is observed to be practically unchanged with  $\alpha$  and the consequent apparent contradiction with previous studies can be explained because mineral dust is the predominant aerosol component in the FT at this  
5 subtropical North Atlantic site. Previous studies have shown that mineral dust is the main contributor to background levels of aerosols in this site, with recirculated Saharan dust or dust from North America as the main expected contributors for these background levels. Meanwhile high AOD conditions are associated with the presence of Saharan dust with an increase in both fine- and coarse-mode aerosol volume concentration.

The lack of correlation between lidar ratio and  $\alpha$  for almost pure mineral dust reflects that this type of aerosol on the  
10 subtropical North Atlantic region maintains a similar backscattering and extinction efficiency regardless of the predominant mode of dust size distribution.

## 7 Summary and conclusions

Ten years of systematic MPL-lidar and photometric measurements made in the island of Tenerife have been used in this work to determine the lidar ratio associated with Saharan mineral dust in the subtropical North Atlantic. This is a region strongly  
15 influenced by the Saharan Air Layer and the results presented here might be considered representative of the Saharan dust transported westward over the North Atlantic in the subtropical belt as a result of the homogeneity and longevity of this elevated layer.

Meanwhile an aerosol mixture between marine and dust is the predominant aerosol within the subtropical marine boundary layer, almost pure mineral dust can be anticipated to be the dominant aerosol in the free troposphere. In an effort to prevent the  
20 occurrence of mixtures of different aerosols and to avoid the higher uncertainties expected for this type of ground-based lidar system at lower altitudes, we have restricted this analysis to the subtropical FT.

Three different methods have been used to estimate the lidar ratio ( $S_{aer}(FT)$ ) for almost pure mineral dust, using information extracted at Santa Cruz de Tenerife coastal station and at Izaña Observatory (in FT conditions). The first method uses inversion of sky radiance measurements from a sun/sky photometer placed at Izaña Observatory. This robust technique has been  
25 used as an independent reference to compare the results obtained from the other two methods used in this work. The second technique uses lidar information and a range-independent lidar ratio to estimate the aerosol extinction profile. This single layer approach (the One-Layer method), based on the Fernald-Klett inversion method, uses the AOD and lidar profiles measured at Santa Cruz de Tenerife. The last method, the Two-Layer approach, is also an inversion method based on the Fernald-Klett method, but incorporates AOD measurements at the sea level and at the high mountain Izaña Observatory, taking advantage of  
30 the singular orographic characteristics of Tenerife. This method is expected to match better the real lower troposphere vertical structure of the North Atlantic subtropical region.

A lidar ratio of  $50 \pm 11$  sr for the Saharan dust at 523 nm is derived from the analysis conducted in this study with the Two-Layer method over a period of 10 years. The mean lidar ratio value derived from the Izaña Observatory photometer, with



a value of  $49 \pm 6$  sr, agrees very well with that obtained with the MPL. This good agreement between techniques, with a mean discrepancy of about 1 sr, confirms the consistency of the  $S_{aer}(FT)$  obtained by these two methods throughout a decade. This consistency is also reasserted considering the good agreement with previous results performed by means of airborne HSRL observations in a region near the Canary Islands (Groß et al., 2013). However, the One-Layer method provided a columnar  
5 lidar ratio of  $24 \pm 10$  sr, considerably lower than the previous methods because of the contribution of the marine aerosol in the MBL, which tends to reduce the value of the lidar ratio. From these results we conclude that the Two-Layer method not only is an improved conceptual approach that matches the real lower troposphere structure better than the single layer approach, but also gives lidar ratio results which have been validated with independent measurements. This results in more reliable extinction vertical profiles.

10 We have quantified the impact of using a range-independent lidar ratio in the inversion method in a region where two well-differentiated layers constitute a typical meteorological feature. Median extinction coefficient difference in the 2007-2017 time period of 92 % and -25 % were found at surface level and above the thermal inversion, respectively, when the One- and the Two-Layer methods were compared. Maximum differences in the extinction profile were found at surface level, with  $\sim 25$  % of the single-layer inversions overestimating  $\sigma_{aer}$  by more than 200 %. We conclude that the classical One-Layer approach  
15 underestimates the aerosol extinction profile in the FT while overestimating aerosol extinction in the MBL for clean conditions and moderate Saharan dust outbreaks. These are the most frequent conditions at this latitude in which the lidar ratio is expected to be range-dependent.

The lack of correlation between lidar ratio and  $\alpha$  for almost pure mineral dust found in this work reflects that mineral dust over the subtropical North Atlantic shows a similar backscattering and extinction efficiency regardless of the predominant  
20 mode of dust size distribution. These results, in accordance with previous studies, suggest that dust is always the predominant aerosol in the North Atlantic free troposphere. The lack of correlation between lidar ratio and  $\alpha$  observed and the  $S_{aer}$  value for almost pure mineral dust set in this work might be helpful for the optical properties retrieval and provide key information for aerosol classification algorithms in a region of relevant importance for the Saharan dust transport over the North Atlantic.

Finally, we have proved that reliable lidar ratios, and therefore aerosol extinction profiles, can be retrieved by incorporating  
25 additional information and previous knowledge about the aerosol vertical distribution using a decade of observations, despite the inherent limitations of the elastic lidar technique.

*Author contributions.* Alberto Berjón, Africa Barreto and Yballa Hernández conceived and designed the methodology and wrote the paper. Margarita Yela, Carlos Toledano and Emilio Cuevas provided financial support and resources. Emilio Cuevas supervised this research activity. All authors discussed the results and contributed to the final paper.

30 *Competing interests.* The authors declare that they have no conflict of interest.



*Acknowledgements.* This work has been developed within the framework of the activities of the World Meteorological Organization (WMO) Commission for Instruments and Methods of Observations (CIMO) Izaña test bed for aerosols and water vapour remote sensing instruments. AERONET Sun photometers at Izaña have been calibrated within the AERONET Europe TNA, supported by the European Union's Horizon 2020 research and innovation program under grant agreement no. 654109 (ACTRIS-2). The authors also acknowledge the AERONET team  
5 for their support, the Juan de la Cierva postdoctoral fellowship (JCI-2010-06097) from the Spanish Ministry of Science and Innovation, as well as the AMISOC project, CGL2011-24891, from the Spanish Plan for Research, Development and Innovation, which has partially supported the maintenance of the lidar at Santa Cruz de Tenerife. Our colleague Celia Milford improved the English of this paper.





## References

- Ackermann, J.: The Extinction-to-Backscatter Ratio of Tropospheric Aerosol: A Numerical Study, *J. Atmos. Ocean. Tech.*, 15, 1043–1050, [https://doi.org/10.1175/1520-0426\(1998\)015<1043:TETBRO>2.0.CO;2](https://doi.org/10.1175/1520-0426(1998)015<1043:TETBRO>2.0.CO;2), 1998.
- Alonso-Pérez, S., Cuevas, E., Perez, C., Querol, X., Baldasano, J., Draxler, R., and Bustos, J. D.: Trend changes of African air mass intrusions in the marine boundary layer over the subtropical Eastern North Atlantic region in winter, *Tellus B*, 63, <https://doi.org/10.1111/j.1600-0889.2010.00524.x>, 2011.
- Amiridis, V., Wandinger, U., Marinou, E., Giannakaki, E., Tsekeri, A., Basart, S., Kazadzis, S., Gkikas, A., Taylor, M., Baldasano, J., and Ansmann, A.: Optimizing CALIPSO Saharan dust retrievals, *Atmos. Chem. Phys.*, 13, 12 089–12 106, <https://doi.org/10.5194/acp-13-12089-2013>, 2013.
- 10 Ansmann, A.: Ground-truth aerosol lidar observations: Can the Klett solutions obtained from ground and space be equal for the same aerosol case?, *Appl. Optics*, 45, 3367–3371, <https://doi.org/10.1364/AO.45.003367>, 2006.
- Ansmann, A., Müller, D., Wandinger, U., and Mamouri, R.: Lidar profiling of aerosol optical and microphysical properties from space: overview, review, and outlook, in: *Lidar Remote Sensing for Industry and Environment Monitoring*, vol. 8795, pp. 8795 – 8795 – 9, <https://doi.org/10.1117/12.2028112>, 2013.
- 15 Balis, D. S., Amiridis, V., Nickovic, S., Papayannis, A., and Zerefos, C.: Optical properties of Saharan dust layers as detected by a Raman lidar at Thessaloniki, Greece, *Geophys. Res. Lett.*, 31, <https://doi.org/10.1029/2004GL019881>, 2004.
- Barnaba, F. and Gobbi, G. P.: Lidar estimation of tropospheric aerosol extinction, surface area and volume: Maritime and desert-dust cases, *J. Geophys. Res.*, 106, 3005–3018, <https://doi.org/10.1029/2000JD900492>, 2001.
- Barreto, A., Cuevas, E., Pallé, P., Romero, P. M., Guirado, C., Wehrli, C. J., and Almansa, F.: Recovering long-term aerosol optical depth series (1976–2012) from an astronomical potassium-based resonance scattering spectrometer, *Atmos. Meas. Tech.*, 7, 4103–4116, <https://doi.org/10.5194/amt-7-4103-2014>, 2014.
- 20 Basart, S., Pérez, C., Cuevas, E., Baldasano, J. M., and Gobbi, G. P.: Aerosol characterization in Northern Africa, Northeastern Atlantic, Mediterranean Basin and Middle East from direct-sun AERONET observations, *Atmos. Chem. Phys.*, 9, 8265–8282, <https://doi.org/10.5194/acp-9-8265-2009>, 2009.
- 25 Bréon, F.: Aerosol extinction-to-backscatter ratio derived from passive satellite measurements, *Atmos. Chem. Phys.*, 13, 8947–8954, <https://doi.org/10.5194/acp-13-8947-2013>, 2013.
- Bösenberg, J. and Hoff, R.: Plan for the implementation of the GAW Aerosol Lidar Observation Network GALION, Tech. Rep. WMO/GAW No. 178, World Meteorological Organization, available at: [http://library.wmo.int/pmb\\_ged/wmo-td\\_1443.pdf](http://library.wmo.int/pmb_ged/wmo-td_1443.pdf) (last access: 12 December 2018), 2007.
- 30 Campbell, J. R., Hlavka, D. L., Welton, E. J., Flynn, C. J., Turner, D. D., Spinhirne, J. D., Scott, V. S., and Hwang, I. H.: Full-Time, Eye-Safe Cloud and Aerosol Lidar Observation at Atmospheric Radiation Measurement Program Sites: Instruments and Data Processing, *J. Atmos. Ocean. Tech.*, 19, 431–442, [https://doi.org/10.1175/1520-0426\(2002\)019<0431:FTESCA>2.0.CO;2](https://doi.org/10.1175/1520-0426(2002)019<0431:FTESCA>2.0.CO;2), 2002.
- Carrillo, J., Guerra, J. C., Cuevas, E., and Barrancos, J.: Characterization of the Marine Boundary Layer and the Trade-Wind Inversion over the Sub-tropical North Atlantic, *Bound.-Layer Meteorol.*, 158, 311–330, <https://doi.org/10.1007/s10546-015-0081-1>, 2016.
- 35 Clothiaux, E. E., Mace, G. G., Ackerman, T. P., Kane, T. J., Spinhirne, J. D., and Scott, V. S.: An Automated Algorithm for Detection of Hydrometeor Returns in Micropulse Lidar Data, *J. Atmos. Ocean. Tech.*, 15, 1035–1042, [https://doi.org/10.1175/1520-0426\(1998\)015<1035:AAAFDO>2.0.CO;2](https://doi.org/10.1175/1520-0426(1998)015<1035:AAAFDO>2.0.CO;2), 1998.

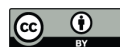

- Cordoba-Jabonero, C., Sorribas, M., Guerrero-Rascado, J. L., Adame, J. A., Hernández, Y., Lyamani, H., Cachorro, V., Gil, M., Alados-Arboledas, L., Cuevas, E., and de la Morena, B.: Synergetic monitoring of Saharan dust plumes and potential impact on surface: a case study of dust transport from Canary Islands to Iberian Peninsula, *Atmos. Chem. Phys.*, 11, 3067–3091, <https://doi.org/10.5194/acp-11-3067-2011>, 2011.
- 5 Cordoba-Jabonero, C., Adame, J., Grau, D., Cuevas, E., and Gil-Ojeda, M.: Lidar ratio discrimination retrieval in a two-layer aerosol system from elastic lidar measurements in synergy with sun-photometry data, in: Conference Proceedings of the 1st International Conference on Atmospheric Dust - DUST 2014, vol. 1, pp. 243 – 248, <https://doi.org/10.14644/dust.2014.040>, 2014.
- Cuevas, E., González, Y., Rodríguez, S., Guerra, J. C., Gómez-Peláez, A. J., Alonso-Pérez, S., Bustos, J., and Milford, C.: Assessment of atmospheric processes driving ozone variations in the subtropical North Atlantic free troposphere, *Atmos. Chem. Phys.*, 13, 1973–1998, <https://doi.org/10.5194/acp-13-1973-2013>, 2013.
- 10 Cuevas, E., Camino, C., Benedetti, A., Basart, S., Terradellas, E., Baldasano, J. M., Morcrette, J. J., Marticorena, B., Goloub, P., Mortier, A., Berjón, A., Hernández, Y., Gil-Ojeda, M., and Schulz, M.: The MACC-II 2007–2008 reanalysis: atmospheric dust evaluation and characterization over northern Africa and the Middle East, *Atmos. Chem. Phys.*, 15, 3991–4024, <https://doi.org/10.5194/acp-15-3991-2015>, 2015a.
- 15 Cuevas, E., Milford, C., Bustos, J., del Campo-Hernández, R., García, O., García, R., Gómez-Peláez, A., Ramos, R., Redondas, A., Reyes, E., Romero-Campos, S. R. P., Schneider, M., Belmonte, J., Gil-Ojeda, M., Almansa, F., Alonso-Pérez, S., Barreto, A., Guirado-Fuentes, Y. G.-M. C., López-Solano, C., Afonso, S., Bayo, C., Berjón, A., Bethencourt, J., Camino, C., Carreño, V., Castro, N., Cruz, A., Damas, M., Ory-Ajamil, F. D., García, M., de Mesa, C. F., González, Y., Hernández, C., Hernández, Y., Hernández, M., Hernández-Cruz, B., Jover, M., Kühn, S., López-Fernández, R., López-Solano, J., Peris, A., Rodríguez-Franco, J., Sálamo, C., púlveda, E. S., and Sierra, M.: Izaña Atmospheric Research Center Activity Report 2012–2014, Tech. Rep. WMO/GAW No. 219, World Meteorological Organization & Izaña Atmospheric Research Center (AEMET), available at: [https://library.wmo.int/pmb\\_ged/gaw\\_219\\_en.pdf](https://library.wmo.int/pmb_ged/gaw_219_en.pdf) (last access: 12 December 2018), 2015b.
- 20 Cuevas, E., Gómez-Peláez, A., Rodríguez, S., Terradellas, E., Basart, S., García, R., García, O., and Alonso-Pérez, S.: The pulsating nature of large-scale Saharan dust transport as a result of interplays between mid-latitude Rossby waves and the North African Dipole Intensity, *Atmos. Environ.*, 167, 586 – 602, <https://doi.org/10.1016/j.atmosenv.2017.08.059>, 2017a.
- 25 Cuevas, E., Milford, C., Bustos, J., del Campo-Hernández, R., García, O., García, R., Gómez-Peláez, A., Guirado-Fuentes, C., Marrero, C., Prats, N., Ramos, R., Redondas, A., Reyes, E., Romero-Campos, S. R. P., Schneider, M., Belmonte, J., Yela, M., Almansa, F., Barreto, A., López-Solano, C., Basart, S., Terradellas, E., Afonso, S., Bayo, C., Berjón, A., Bethencourt, J., Carreño, V., Castro, N., Cruz, A., Damas, M., Ory-Ajamil, F. D., García, M., Gómez-Trueba, V., González, Y., Hernández, C., Hernández, Y., Hernández-Cruz, B., Jover, M., León-Luís, S., López-Fernández, R., López-Solano, J., Rodríguez, E., Rodríguez-Franco, J., Rodríguez-Valido, M., Sálamo, C., Sanromá, E., Santana, D., Tomás, F. S., Sepúlveda, E., Sierra, M., and Sosa, E.: Izaña Atmospheric Research Center Activity Report 2015–2016, Tech. Rep. WMO/GAW No. 236, World Meteorological Organization & Izaña Atmospheric Research Center (AEMET), available at: [https://library.wmo.int/doc\\_num.php?explnum\\_id=4139](https://library.wmo.int/doc_num.php?explnum_id=4139) (last access: 12 December 2018), 2017b.
- 30 Dubovik, O. and King, M. D.: A flexible inversion algorithm for retrieval of aerosol optical properties from Sun and sky radiance measurements, *J. Geophys. Res. Atmos.*, 105, 20 673–20 696, <https://doi.org/10.1029/2000JD900282>, 2000.
- Dubovik, O., Sinyuk, A., Lapyonok, T., Holben, B. N., Mishchenko, M., Yang, P., Eck, T. F., Volten, H., Muñoz, O., Veihelmann, B., van der Zande, W. J., Leon, J.-F., Sorokin, M., and Slutsker, I.: Application of spheroid models to account for aerosol particle nonsphericity in remote sensing of desert dust, *J. Geophys. Res. Atmos.*, 111, <https://doi.org/10.1029/2005JD006619>, 2006.

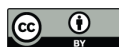

- Endlich, R., Ludwig, F., and Uthe, E.: An automatic method for determining the mixing depth from lidar observations, *Atmos. Environ.* (1967), 13, 1051 – 1056, [https://doi.org/10.1016/0004-6981\(79\)90015-5](https://doi.org/10.1016/0004-6981(79)90015-5), 1979.
- Evans, B. T. N.: Sensitivity of the backscatter/extinction ratio to changes in aerosol properties: implications for lidar, *Appl. Optics*, 27, 3299–3305, <https://doi.org/10.1364/AO.27.003299>, 1988.
- 5 Fernald, F. G.: Analysis of atmospheric lidar observations: some comments, *Appl. Optics*, 23, 652–653, <https://doi.org/10.1364/AO.23.000652>, 1984.
- García, M. I., Rodríguez, S., and Alastuey, A.: Impact of North America on the aerosol composition in the North Atlantic free troposphere, *Atmos. Chem. Phys.*, 17, 7387–7404, <https://doi.org/10.5194/acp-17-7387-2017>, 2017.
- Groß, S., Esselborn, M., Weinzierl, B., Wirth, M., Fix, A., and Petzold, A.: Aerosol classification by airborne high spectral resolution lidar  
10 observations, *Atmos. Chem. Phys.*, 13, 2487–2505, <https://doi.org/10.5194/acp-13-2487-2013>, 2013.
- Guirado, C.: Caracterización de las propiedades de los aerosoles en columna en la región subtropical, Ph.D. thesis, Universidad de Valladolid, available at: <http://uvadoc.uva.es/handle/10324/13220> (last access: 12 December 2018), 2015.
- Holben, B., Eck, T., Slutsker, I., Tanré, D., Buis, J., Setzer, A., Vermote, E., Reagan, J., Kaufman, Y., Nakajima, T., Lavenu, F., Jankowiak, I., and Smirnov, A.: AERONET—A Federated Instrument Network and Data Archive for Aerosol Characterization, *Remote Sens. Environ.*,  
15 66, 1 – 16, [https://doi.org/10.1016/S0034-4257\(98\)00031-5](https://doi.org/10.1016/S0034-4257(98)00031-5), 1998.
- Holben, B. N., Eck, T. F., Slutsker, I., Smirnov, A., Sinyuk, A., Schafer, J., Giles, D., and Dubovik, O.: Aeronet’s Version 2.0 quality assurance criteria, in: *Proceedings of the SPIE*, vol. 6408, pp. 6408 – 6408 – 14, <https://doi.org/10.1117/12.706524>, 2006.
- Kanamitsu, M.: Description of the NMC Global Data Assimilation and Forecast System, *B. Am. Meteorol. Soc.*, 4, 335–342, [https://doi.org/10.1175/1520-0434\(1989\)004<0335:DOTNGD>2.0.CO;2](https://doi.org/10.1175/1520-0434(1989)004<0335:DOTNGD>2.0.CO;2), 1989.
- 20 Karyampudi, V. M., Palm, S. P., Reagen, J. A., Fang, H., Grant, W. B., Hoff, R. M., Pierce, H. F., Torres, O., Browell, E. V., and Melfi, S. H.: Validation of the Saharan Dust plume conceptual model using Lidar, Meteosat, and ECMWF Data, *B. Am. Meteorol. Soc.*, 80, 1045–1075, [https://doi.org/10.1175/1520-0477\(1999\)080<1045:VOTSDP>2.0.CO;2](https://doi.org/10.1175/1520-0477(1999)080<1045:VOTSDP>2.0.CO;2), 1999.
- Kim, M.-H., Omar, A. H., Tackett, J. L., Vaughan, M. A., Winker, D. M., Trepte, C. R., Hu, Y., Liu, Z., Poole, L. R., Pitts, M. C., Kar, J., and Magill, B. E.: The CALIPSO Version 4 Automated Aerosol Classification and Lidar Ratio Selection Algorithm, *Atmos. Meas. Tech.*, 11,  
25 6107–6135, <https://doi.org/10.5194/amt-11-6107-2018>, 2018.
- Klett, J. D.: Lidar inversion with variable backscatter/extinction ratios, *Appl. Optics*, 24, 1638–1643, <https://doi.org/10.1364/AO.24.001638>, 1985.
- Kovalev, V. A.: Sensitivity of the lidar solution to errors of the aerosol backscatter-to-extinction ratio: Influence of a monotonic change in the aerosol extinction coefficient, *Appl. Optics*, 34, 3457–3462, <https://doi.org/10.1364/AO.34.003457>, 1995.
- 30 Kovalev, V. A. and Eichinger, W. E.: *Elastic Lidar: Theory, Practice, and Analysis Methods*, Wiley-Blackwell, <https://doi.org/10.1002/0471643173>, 2005.
- Martín, J. L., Bethencourt, J., and Cuevas-Agulló, E.: Assessment of global warming on the island of Tenerife, Canary Islands (Spain). Trends in minimum, maximum and mean temperatures since 1944, *Climatic Change*, 114, 343–355, <https://doi.org/10.1007/s10584-012-0407-7>, 2012.
- 35 Mona, L., Amodeo, A., Pandolfi, M., and Pappalardo, G.: Saharan dust intrusions in the Mediterranean area: Three years of Raman lidar measurements, *J. Geophys. Res. Atmos.*, 111, <https://doi.org/10.1029/2005JD006569>, 2006.
- Mona, L., Liu, Z., Müller, D., Omar, A., Papayannis, A., Pappalardo, G., Sugimoto, N., and Vaughan, M.: Lidar measurements for desert dust characterization: An overview, *Adv. Meteorol.*, 1201212, <https://doi.org/10.1155/2012/356265>, 2012.

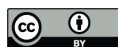

- Morille, Y., Haeffelin, M., Drobinski, P., and Pelon, J.: STRAT: An Automated Algorithm to Retrieve the Vertical Structure of the Atmosphere from Single-Channel Lidar Data, *J. Atmos. Ocean. Tech.*, 24, 761–775, <https://doi.org/10.1175/JTECH2008.1>, 2007.
- Müller, D., Mattis, I., Wandinger, U., Ansmann, A., Althausen, D., Dubovik, O., Eckhardt, S., and Stohl, A.: Saharan dust over a central European EARLINET-AERONET site: Combined observations with Raman lidar and Sun photometer, *J. Geophys. Res. Atmos.*, 108, <https://doi.org/10.1029/2002JD002918>, 2003.
- Müller, D., Ansmann, A., Mattis, I., Tesche, M., Wandinger, U., Althausen, D., and Pisani, G.: Aerosol-type-dependent lidar ratios observed with Raman lidar, *J. Geophys. Res. Atmos.*, 112, <https://doi.org/10.1029/2006JD008292>, d16202, 2007.
- Omar, A. H., Winker, D. M., Vaughan, M. A., Hu, Y., Trepte, C. R., Ferrare, R. A., Lee, K.-P., Hostetler, C. A., Kittaka, C., Rogers, R. R., Kuehn, R. E., and Liu, Z.: The CALIPSO Automated Aerosol Classification and Lidar Ratio Selection Algorithm, *J. Atmos. Ocean. Tech.*, 26, 1994–2014, <https://doi.org/10.1175/2009JTECHA1231.1>, 2009.
- Papagiannopoulos, N., Mona, L., Alados-Arboledas, L., Amiridis, V., Baars, H., Biniotoglou, I., Bortoli, D., D’Amico, G., Giunta, A., Guerrero-Rascado, J. L., Schwarz, A., Pereira, S., Spinelli, N., Wandinger, U., Wang, X., and Pappalardo, G.: CALIPSO climatological products: evaluation and suggestions from EARLINET, *Atmos. Chem. Phys.*, 16, 2341–2357, <https://doi.org/10.5194/acp-16-2341-2016>, 2016.
- Papayannis, A., Amiridis, V., Mona, L., Tsaknakis, G., Balis, D., Bösenberg, J., Chaikovski, A., De Tomasi, F., Grigorov, I., Mattis, I., Mitev, V., Müller, D., Nickovic, S., Pérez, C., Pietruczuk, A., Pisani, G., Ravetta, F., Rizi, V., Sicard, M., Trickl, T., Wiegner, M., Gerding, M., Mamouri, R. E., D’Amico, G., and Pappalardo, G.: Systematic lidar observations of Saharan dust over Europe in the frame of EARLINET (2000–2002), *J. Geophys. Res. Atmos.*, 113, <https://doi.org/10.1029/2007JD009028>, 2008.
- Pelón, J., Flamant, P., León, J. F., Tanrè, D., Sicard, M., and Satheesh, S. K.: Characterization of aerosol spatial distribution and optical properties over the Indian Ocean from airborne LIDAR and radiometry during INDOEX’99, *J. Geophys. Res.*, 107, 8029, <https://doi.org/10.1029/2001JD000402>, 2002.
- Prospero, J. M.: Saharan dust transport over the north Atlantic Ocean and Mediterranean: An Overview, in *The Impact of Desert Dust from Northern Africa Across the Mediterranean*, Springer, Dordrecht, <https://doi.org/10.1007/978-94-017-3354-0>, 1996.
- Prospero, J. M. and Carlson, T. N.: Vertical and areal distribution of Saharan dust over the western equatorial north Atlantic Ocean, *J. Geophys. Res.*, 77, 5255–5265, <https://doi.org/10.1029/JC077i027p05255>, 1972.
- Prospero, J. M. and Carlson, T. N.: Saharan air outbreaks over the Tropical North Atlantic, *Pure Appl. Geophys.*, 119, 677–691, <https://doi.org/10.1007/BF00878167>, 1980.
- Rodríguez, S., Cuevas, E., Prospero, J. M., Alastuey, A., Querol, X., López-Solano, J., García, M. I., and Alonso-Pérez, S.: Modulation of Saharan dust export by the North African dipole, *Atmos. Chem. Phys.*, 15, 7471–7486, <https://doi.org/10.5194/acp-15-7471-2015>, 2015.
- Smirnov, A., Holben, B. N., Slutsker, I., Welton, E. J., and Formenti, P.: Optical properties of Saharan dust during ACE 2, *J. Geophys. Res.*, 103, 28 079–28 092, <https://doi.org/10.1029/98JD01930>, 1998.
- Smirnov, A., Holben, B. N., Eck, T. F., Dubovik, O., and Slutsker, I.: Cloud-screening and quality control algorithms for the AERONET database, *Remote Sens. Environ.*, 73, 337–349, [https://doi.org/10.1016/S0034-4257\(00\)00109-7](https://doi.org/10.1016/S0034-4257(00)00109-7), 2000.
- Song, Y., Zhang, B., Shi, G., Li, S., Di, H., Yan, Q., and Hua, D.: Correlation between the lidar ratio and the Ångström exponent of various aerosol types, *Particuology*, 40, 62 – 69, <https://doi.org/10.1016/j.partic.2017.12.002>, 2018.
- Spinhirne, J.: Micro pulse lidar, *IEEE T. Geosci. Remote.*, 31, 48–55, <https://doi.org/10.1109/36.210443>, 1993.



- Toledano, C., González, R. and Fuertes, D., Cuevas, E., Eck, T. F. and Kazadzis, S., Kouremeti, N., Gröbner, J., Goloub, P., Blarel, L., Román, R., Barreto, A., Berjón, A., Holben, B. N., , and Cachorro, V. E.: Assessment of Sun photometer Langley calibration at the high-elevation sites Mauna Loa and Izaña, Atmos. Chem. Phys., 18, 14 555–14 567, <https://doi.org/10.5194/acp-18-14555-2018>, 2018.
- Weitkamp, C., ed.: Lidar. Range-Resolved Optical Remote Sensing of the Atmosphere, Springer-Verlag New York,   
5 <https://doi.org/10.1007/b106786>, 2005.
- Welton, E. J. and Campbell, J. R.: Micropulse Lidar Signals: Uncertainty Analysis, J. Atmos. Ocean. Tech., 19, 2089–2094,   
[https://doi.org/10.1175/1520-0426\(2002\)019<2089:MLSUA>2.0.CO;2](https://doi.org/10.1175/1520-0426(2002)019<2089:MLSUA>2.0.CO;2), 2002.
- Welton, E. J., Campbell, J. R., Spinhirne, J. D., and Scott, V. S.: Global monitoring of clouds and aerosols using a network of micropulse lidar systems, in: Lidar Remote Sensing for Industry and Environment Monitoring, vol. 4153, pp. 4153 – 4153 – 8,   
10 <https://doi.org/10.1117/12.417040>, 2001.

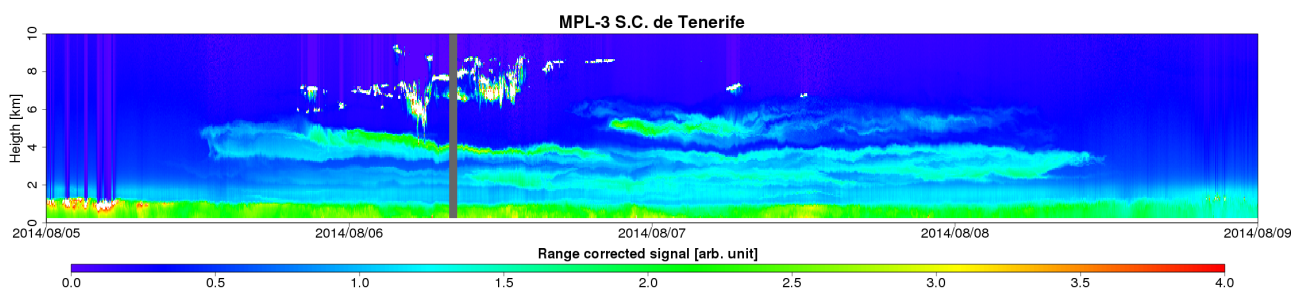

**Figure 1.** Range corrected signal mapping of a dust intrusion over the island of Tenerife on August, 2014. In this case, the dust layer is well separated from the marine layer.

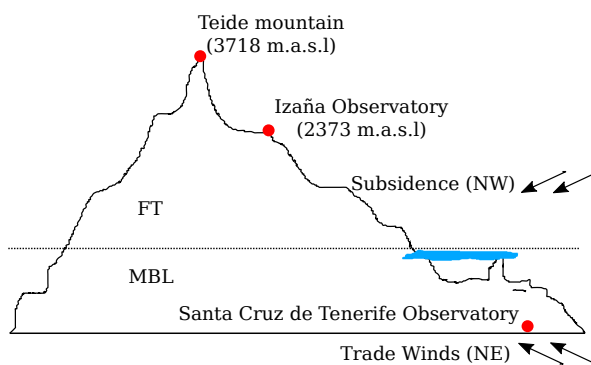

**Figure 2.** Location of Santa Cruz de Tenerife and Izaña observatories on the island of Tenerife.

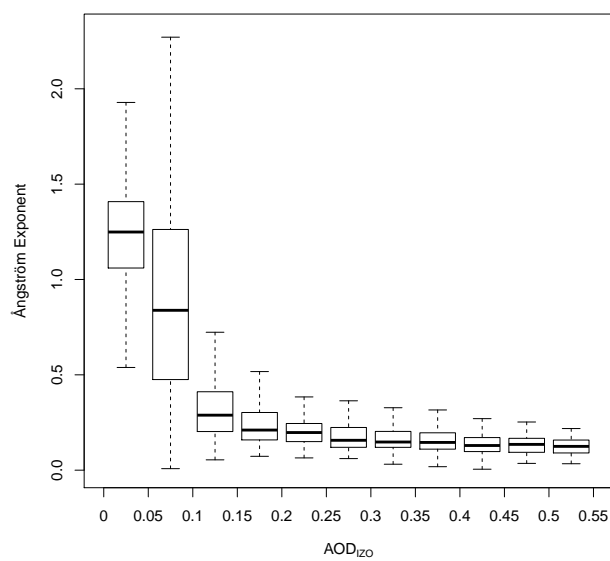

**Figure 3.** Ångström exponent against AOD measured at Izaña between January 2007 and December 2017. AOD above 0.55 are very scarce and therefore are not shown in the plot.



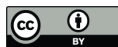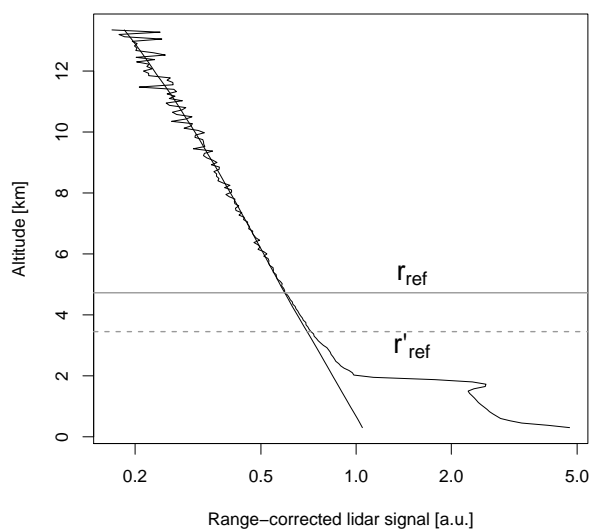

**Figure 4.** Reference altitude determination.  $r'_{ref}$  is the first approximation of the minimum altitude free of aerosols and clouds.  $r_{ref}$  is the final value used in this work.

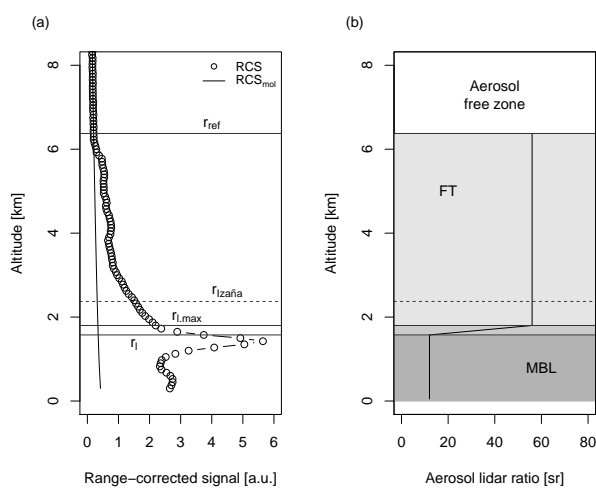

**Figure 5.** Two aerosol layer conceptual model. The boundary between the MBL and the FT,  $r_l$ , is determined using the gradient method.  $r_{l,max}$  and  $r_l$  determines the transition zone.

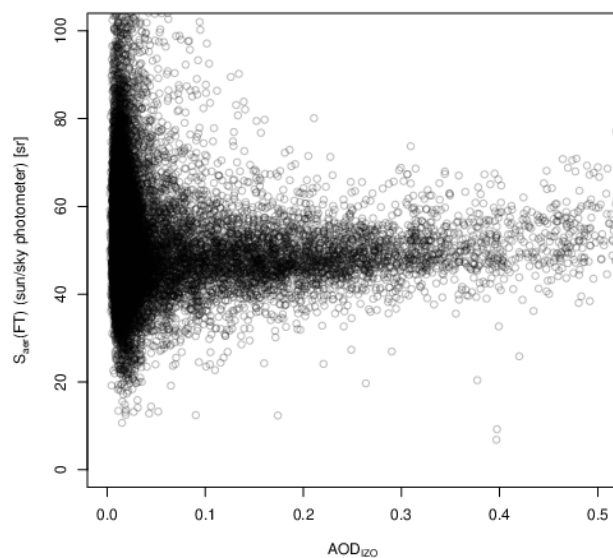

**Figure 6.** Lidar ratio at 523 nm from the sun/sky photometer installed at Izaña observatory against AOD.

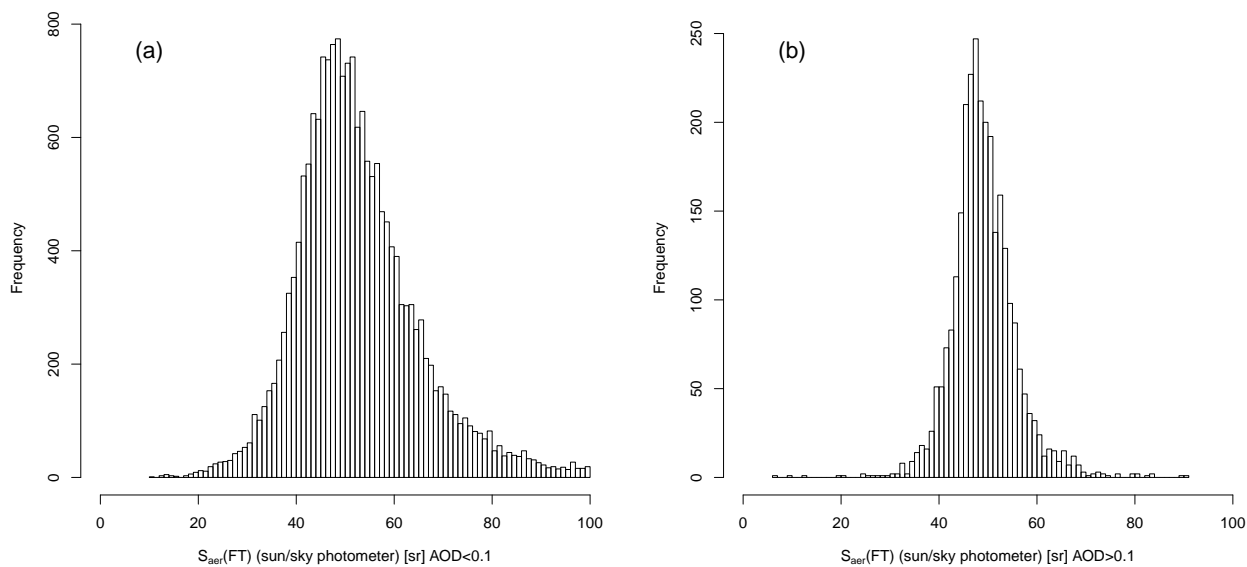

**Figure 7.** Histograms of the lidar ratios at 523 nm obtained from the sun/sky photometer installed at Izaña for (a)  $AOD_{IZO} < 0.1$ , and (b)  $AOD_{IZO} > 0.1$ .

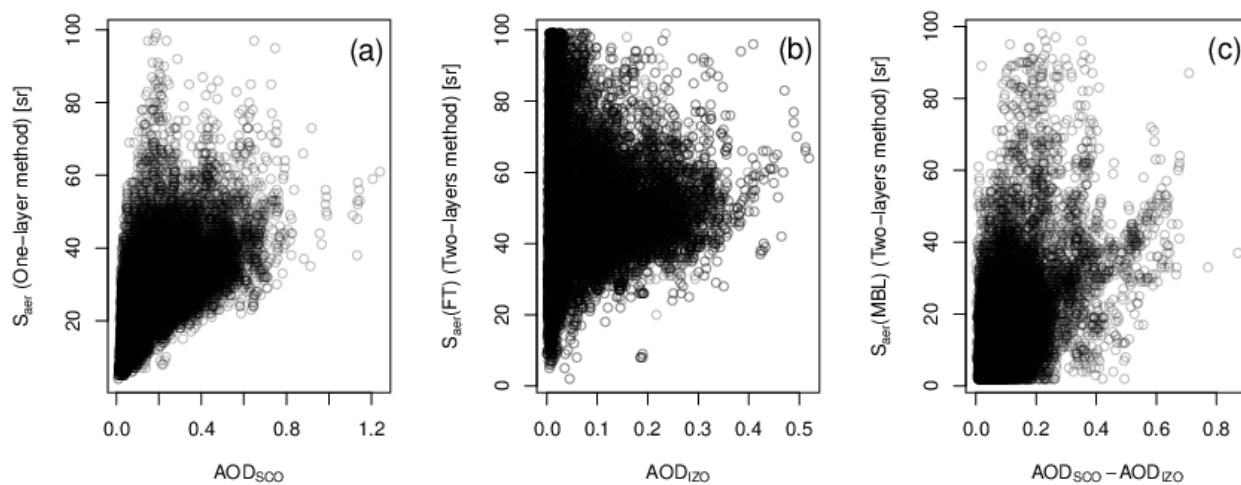

**Figure 8.** Lidar ratio for (a) One-Layer inversion, (b) Two-Layer inversion for the FT and (c) Two-Layer inversion for the MBL, all of them against AOD.

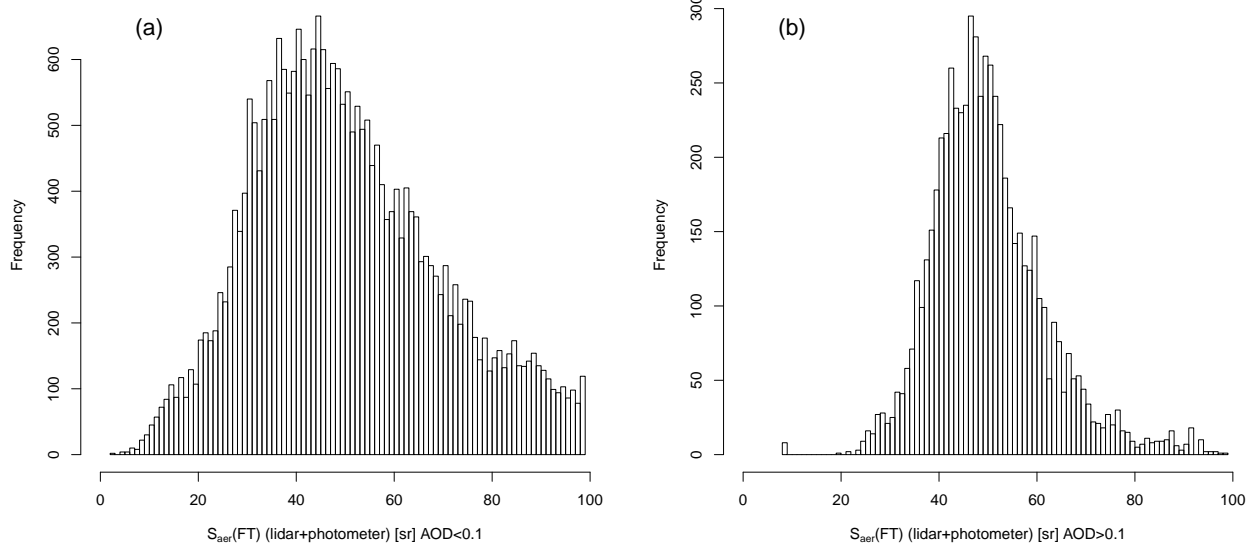

**Figure 9.** Histograms of the FT lidar ratios at 523 nm obtained from Two-Layer inversion for (a)  $AOD_{IZO} < 0.1$ , and (b)  $AOD_{IZO} > 0.1$ .

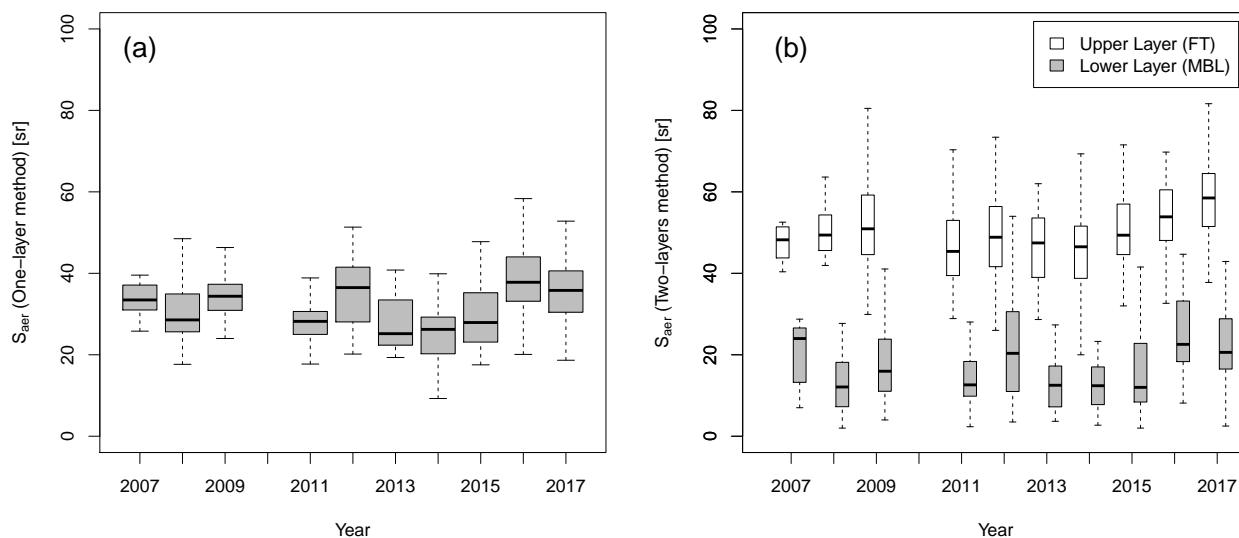

**Figure 10.** Lidar ratio at 523 nm from (a) One-Layer and (b) Two-Layer methods for each year between 2007 and 2017. The central rectangles extends from the first quartile to the third quartile and the median is represented by a horizontal line. The whiskers are defined as the upper and lower quartiles  $\pm 1.5 \text{ IQR}$  (inter-quartile range).

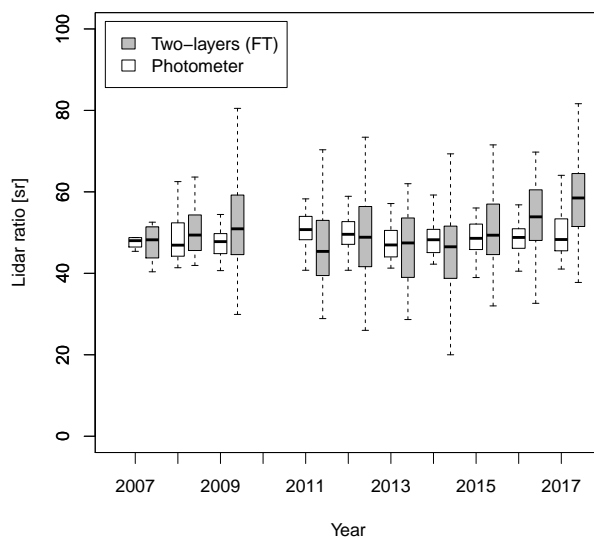

**Figure 11.** Upper layer lidar ratio from Two-Layer method (gray boxes) and from Aeronet inversion of the sun photometer data at Izaña Observatory (white boxes), for each year between 2007 and 2017. The central rectangles extends from the first quartile to the third quartile and the median is represented by a horizontal line. The whiskers are defined as the upper and lower quartiles  $\pm 1.5IQR$  (inter-quartile range)



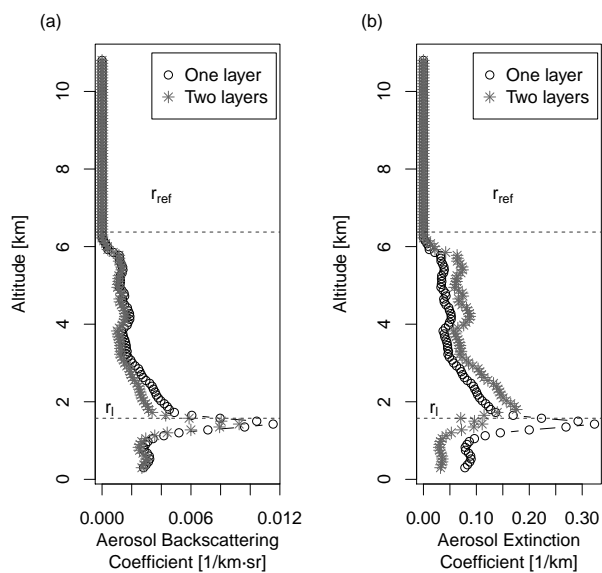

**Figure 12.** Example of the extinction and backscattering coefficients in dust conditions obtained by using One- and Two-Layer methods applied to a lidar profile made on August 5, 2013 ( $AOD_{SCO} = 0.46$ ). Upper limit of the MBL ( $r_l$ ) and FT ( $r_{ref}$ ) are represented by horizontal dashed lines.

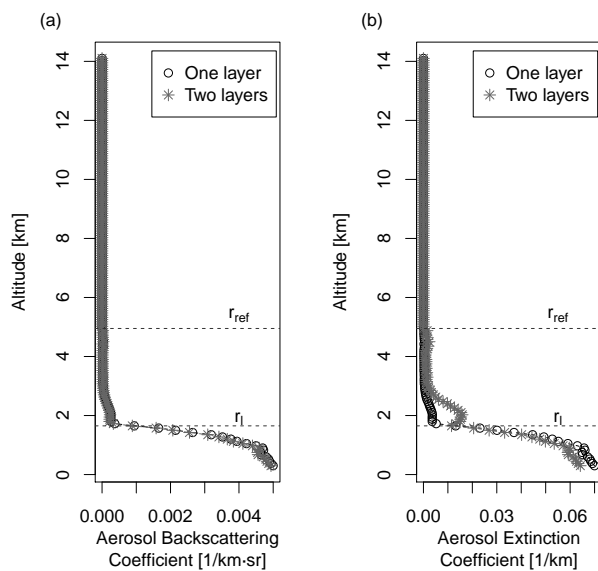

**Figure 13.** Example of the extinction and backscattering coefficients in clean conditions obtained by using One- and Two-Layer methods applied to a lidar profile made on December 27, 2012 ( $AOD_{SCO} = 0.10$ ). Upper limit of the MBL ( $r_l$ ) and FT ( $r_{ref}$ ) are represented by horizontal dashed lines.

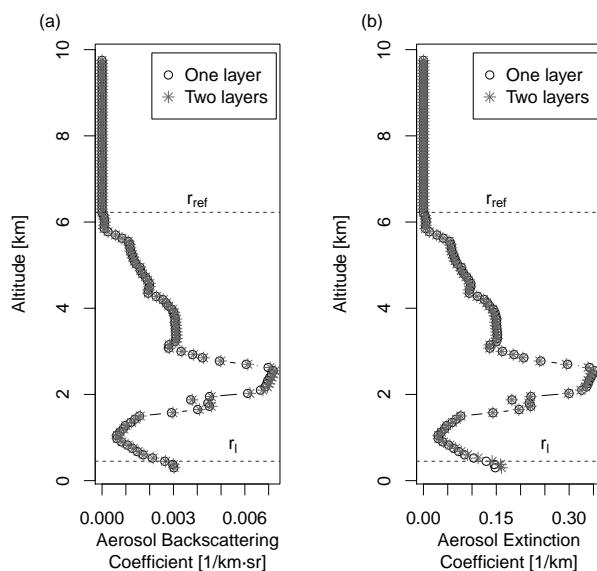

**Figure 14.** Example of the extinction and backscattering coefficients under heavy aerosol load conditions obtained by using One- and Two-Layer methods applied to a lidar profile made on June 28, 2012. Upper limit of the MBL ( $r_l$ ) and FT ( $r_{ref}$ ) are represented by horizontal dashed lines.

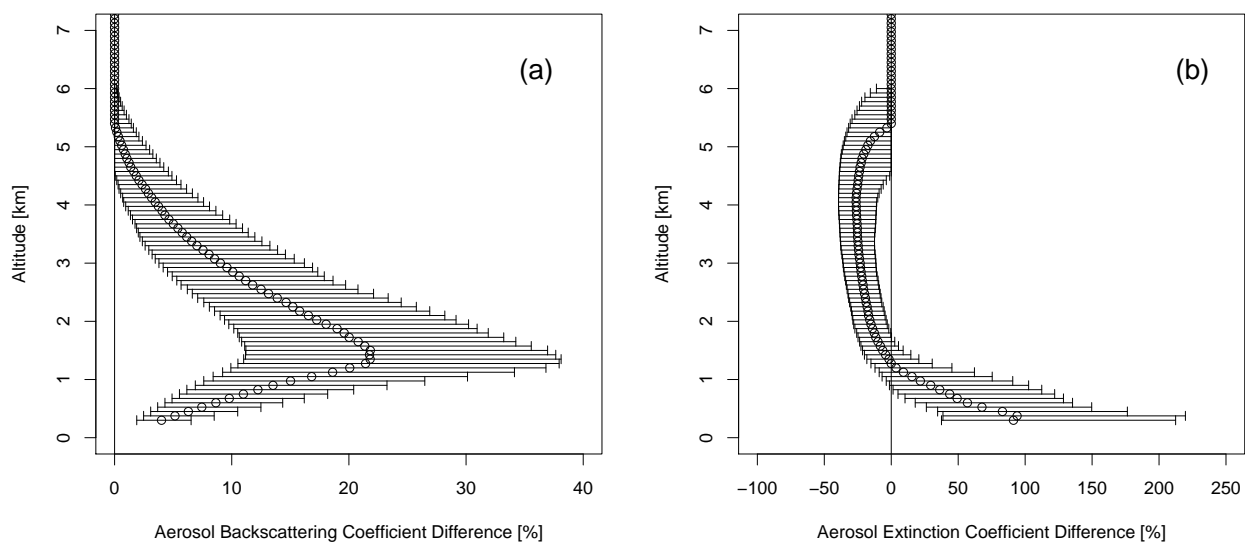

**Figure 15.** Statistics of the differences of extinction and backscattering coefficients obtained by using One- and Two-Layer methods. For each altitude, median difference, first and third quartile are shown.

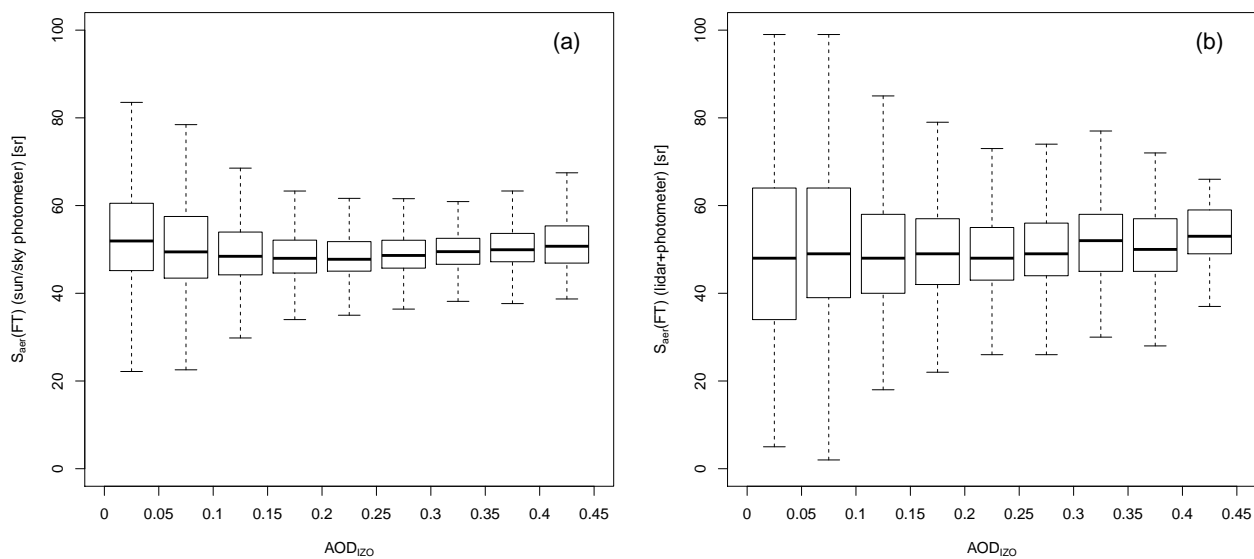

**Figure 16.** Lidar ratios at 523 nm obtained from (a) the sun/sky photometer installed at Izaña and from (b) Two-Layer inversion for the FT for different  $AOD_{IZO}$  intervals. The central rectangles extends from the first quartile to the third quartile and the median is represented by a horizontal line. The whiskers are defined as the upper and lower quartiles  $\pm 1.5 IQR$  (inter-quartile range)

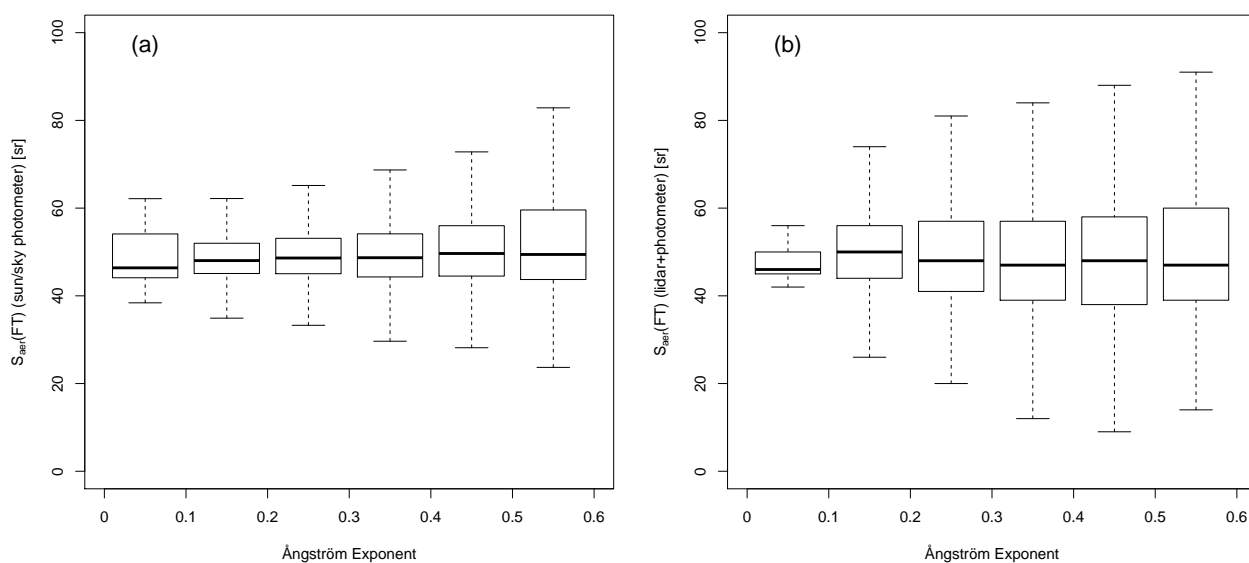

**Figure 17.** Lidar ratios at 523 nm for mineral dust conditions ( $\alpha < 0.6$ ) obtained from (a) the sun/sky photometer installed at Izaña and from (b) Two-Layer inversion for the FT for different Ångström exponent intervals. The central rectangles extends from the first quartile to the third quartile and the median is represented by a horizontal line. The whiskers are defined as the upper and lower quartiles  $\pm 1.5IQR$  (inter-quartile range)

**Table 1.** Micro pulse lidar technical specification

| Transmisior                 |                                             |
|-----------------------------|---------------------------------------------|
| Laser                       | Diode Pumped Nd:YLF                         |
| Wavelength                  | 523 nm                                      |
| Output Pulse Energy         | 10 $\mu\text{J}$                            |
| Pulse Repetition Frequency  | 2500 Hz                                     |
| Pulse Duration              | 10 ns                                       |
| Aperture                    | 20 cm                                       |
| Detector                    |                                             |
| Type                        | Geiger Mode Avalanche<br>Photodiode (G-APD) |
| Manufacturer                | Perkin-Elmer                                |
| Model                       | SPCM-AQR                                    |
| Dark Count Rate             | $< 250 \mu\text{s}^{-1}$                    |
| Bin time                    | 500 ns                                      |
| Equivalent range resolution | 75 m                                        |



**Table 2.** Lidar ratio output from the different methods

| Method                                 | mean $S_{aer}$ [sr] | sd $S_{aer}$ [sr] |
|----------------------------------------|---------------------|-------------------|
| One-Layer                              | 24                  | 10                |
| Two-Layer (MBL)                        | 16                  | 11                |
| Two-Layer (FT) ( $AOD_{IZO} < 0.1$ )   | 51                  | 19                |
| Two-Layer (FT) ( $AOD_{IZO} > 0.1$ )   | 50                  | 11                |
| Izaña Photometer ( $AOD_{IZO} < 0.1$ ) | 52                  | 12                |
| Izaña Photometer ( $AOD_{IZO} > 0.1$ ) | 49                  | 6                 |
